# Supplementary material
Source: ML conference proceedings conference paper supplement (https://openreview.net/forum?id=eNCYpTCGhr)

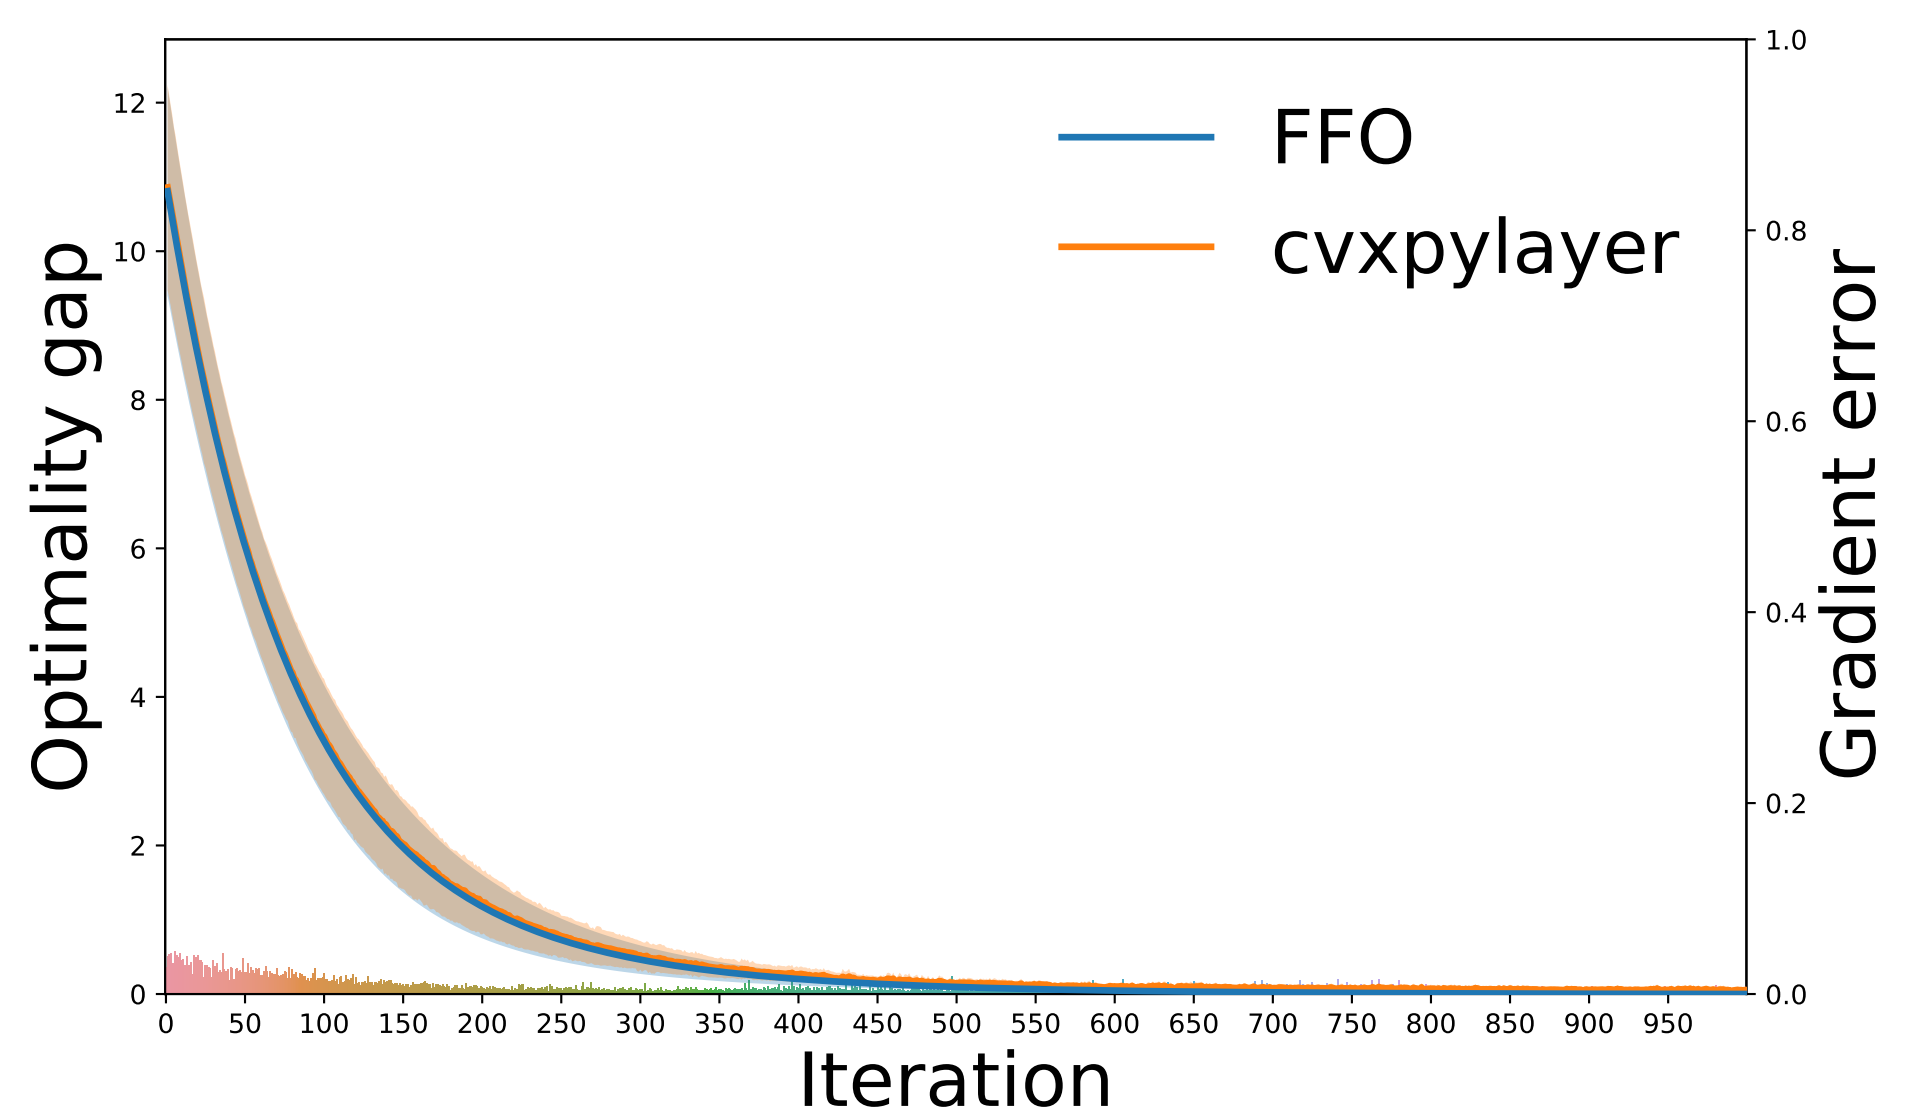

Supplement: supplementary_material [file attachment]

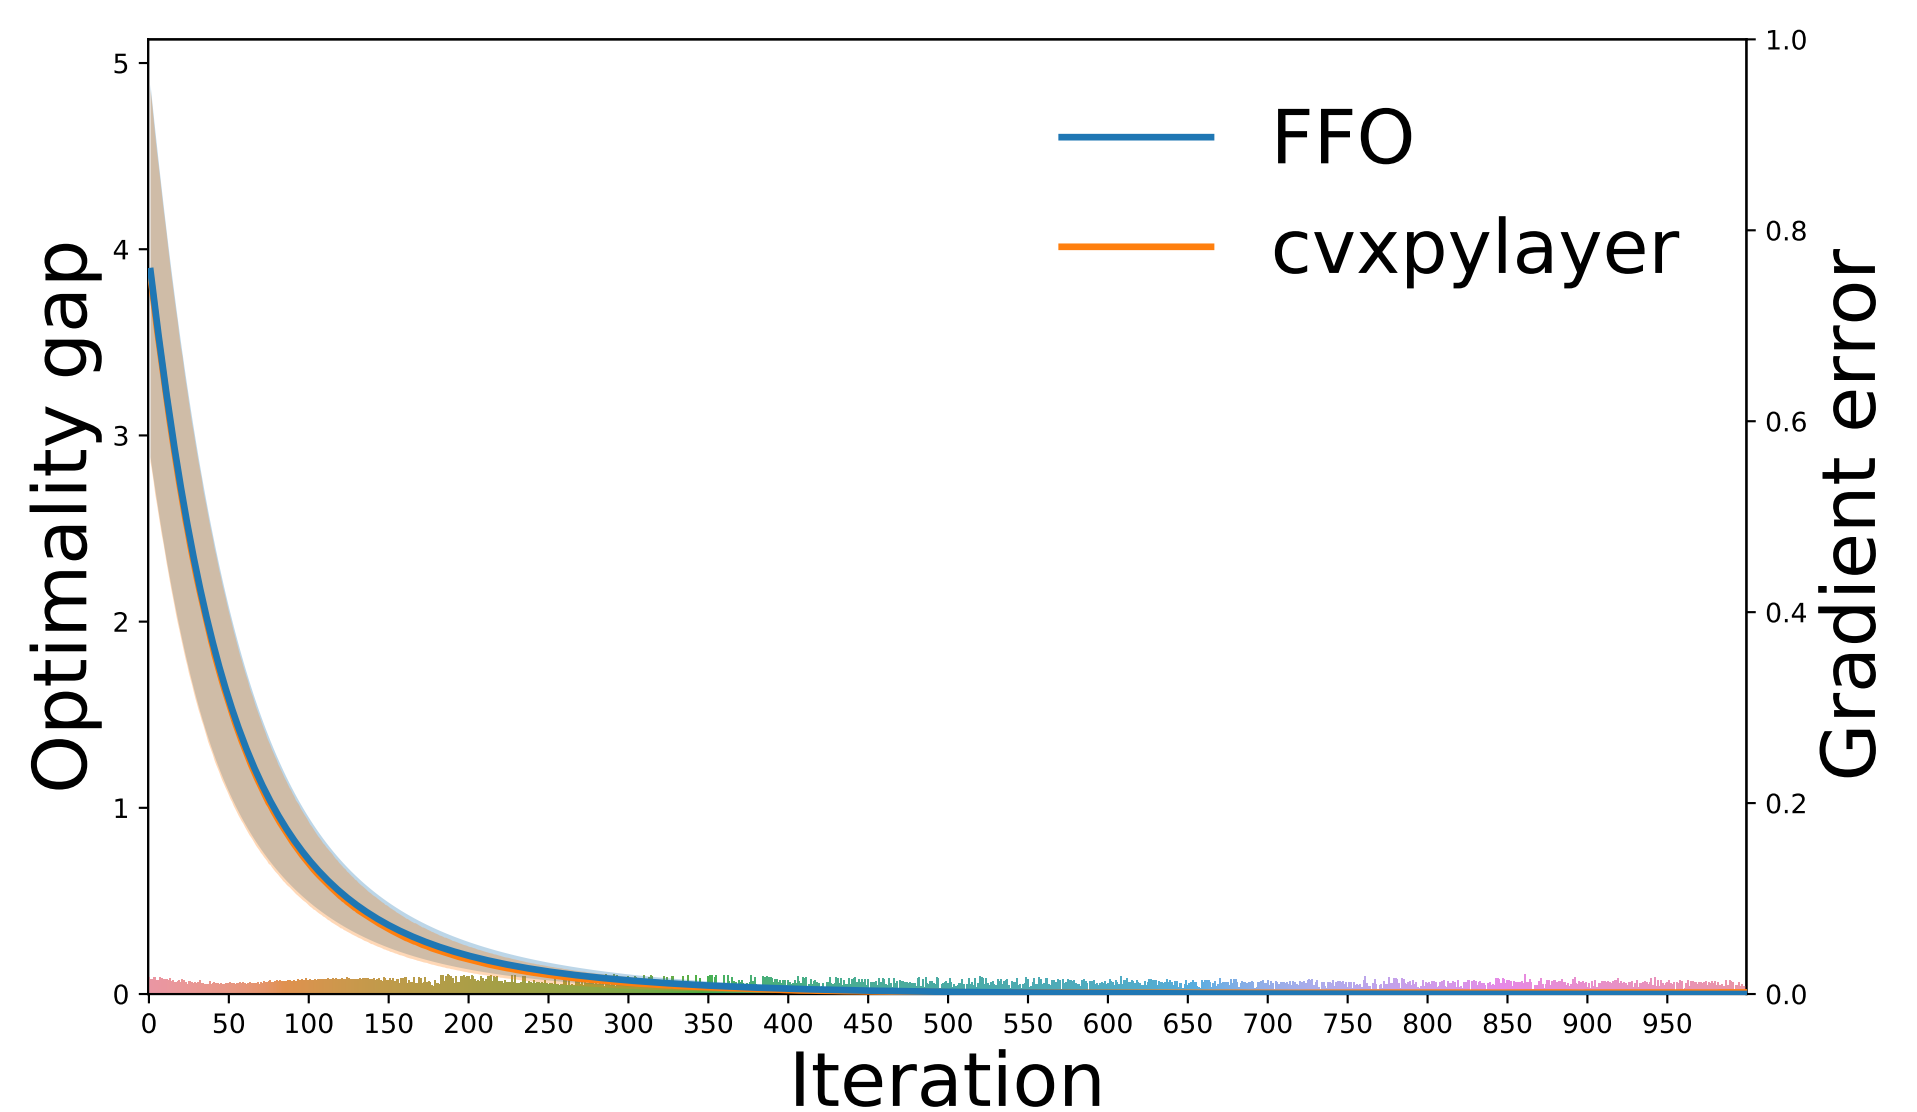

Supplement: supplementary_material [file attachment]

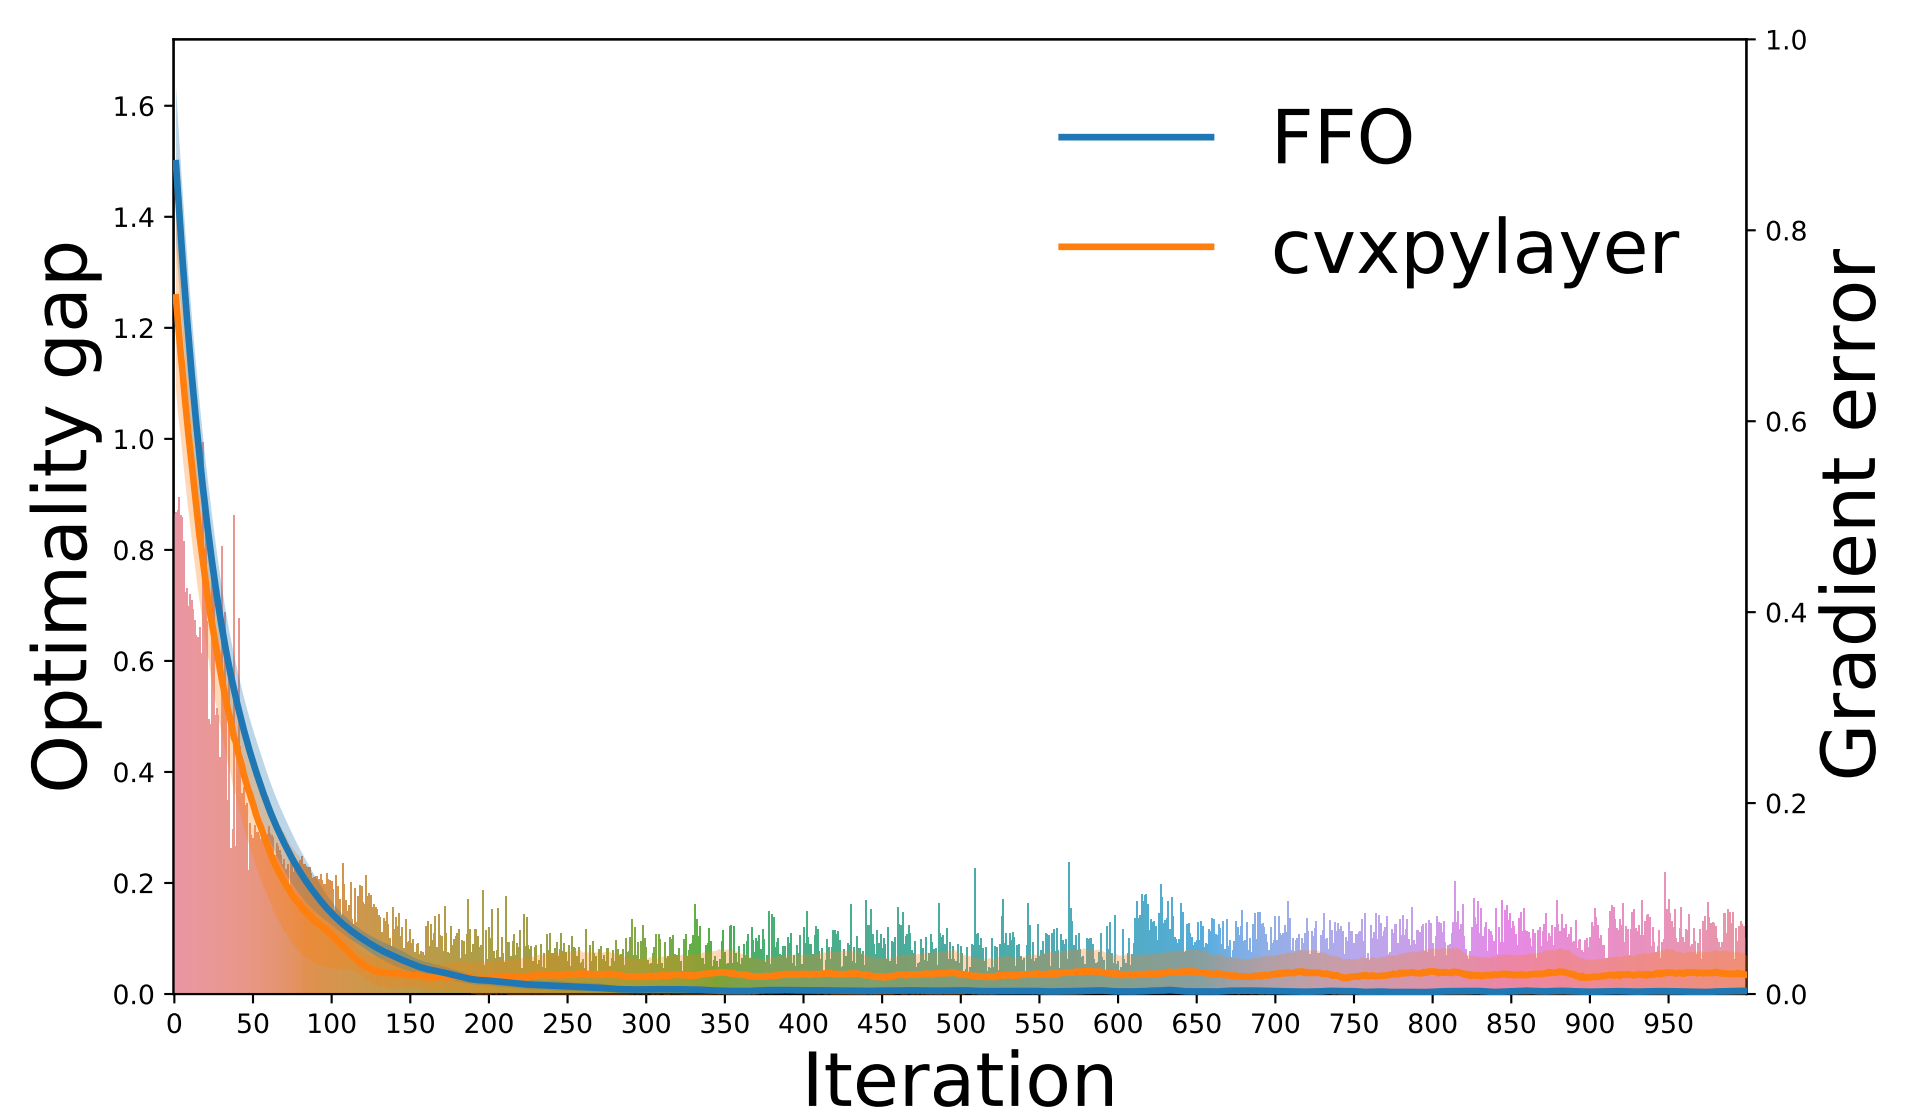

Supplement: supplementary_material [file attachment]

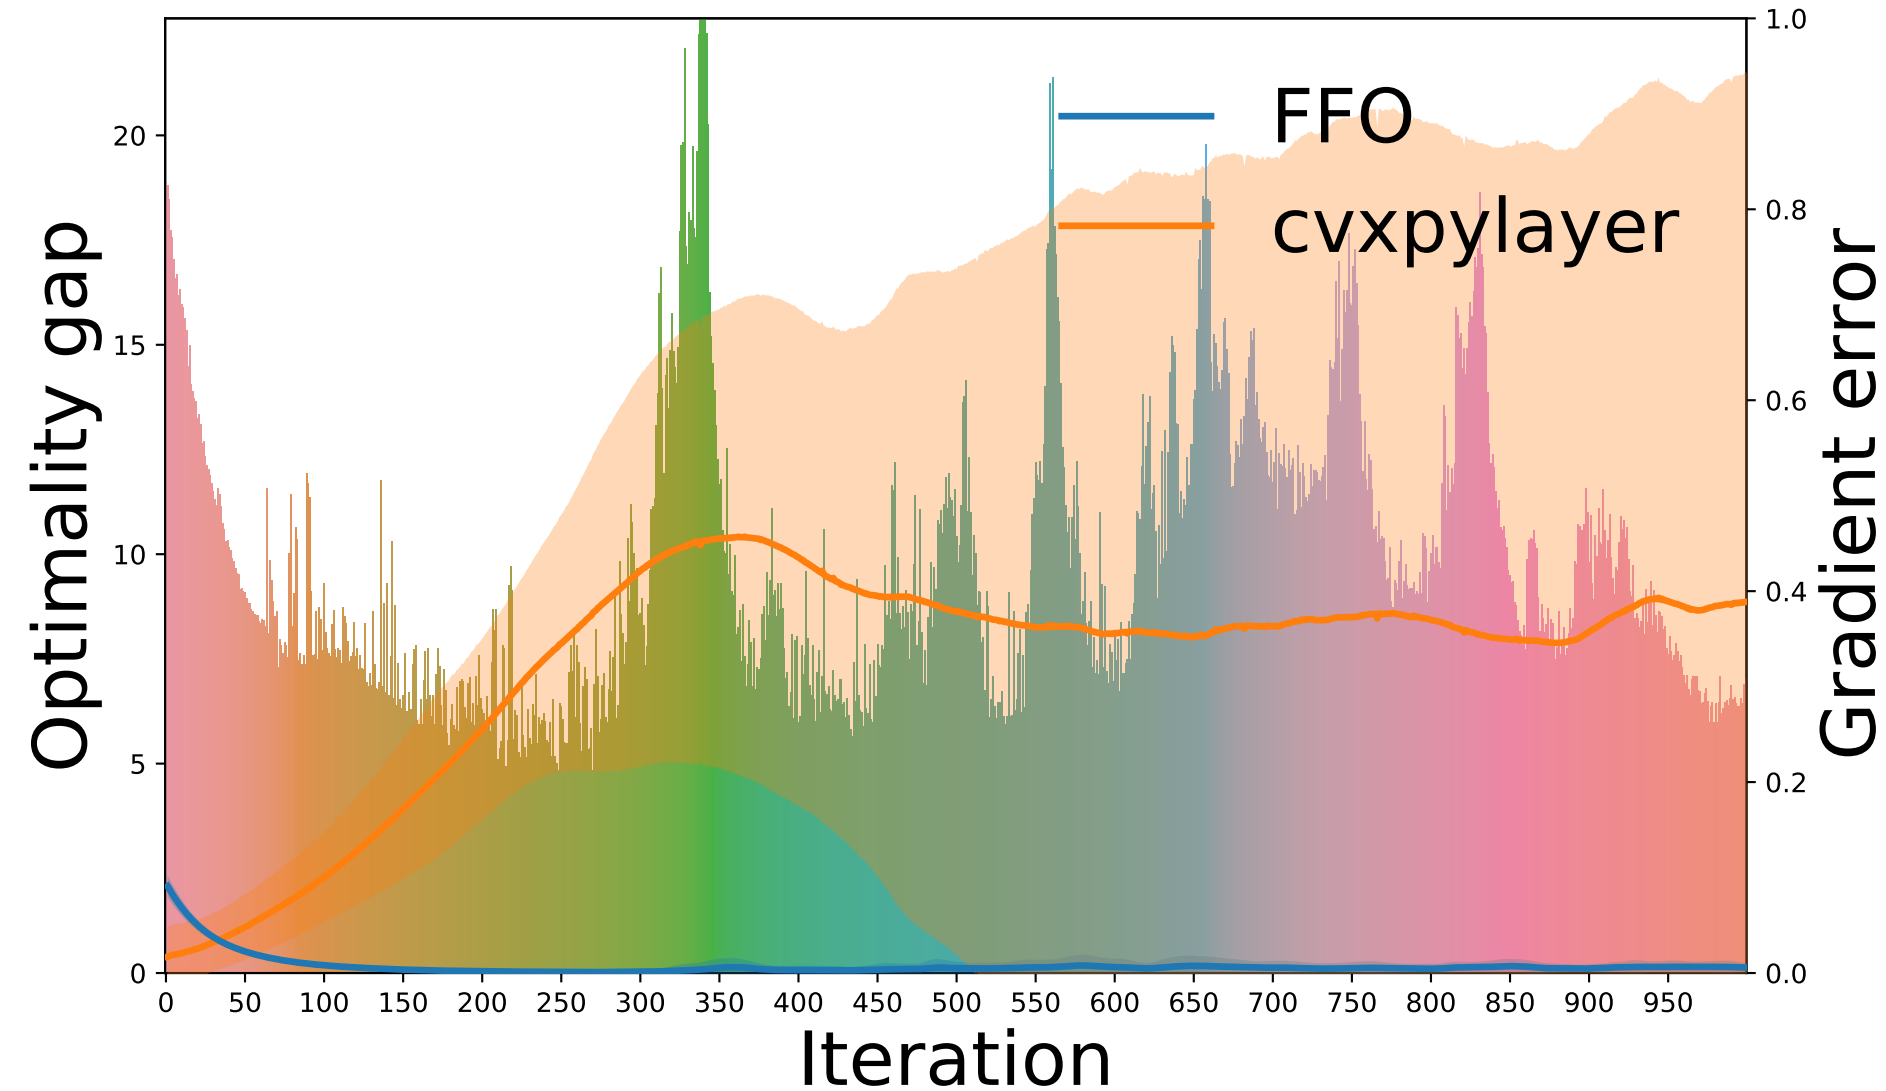

Supplement: supplementary_material [file attachment]

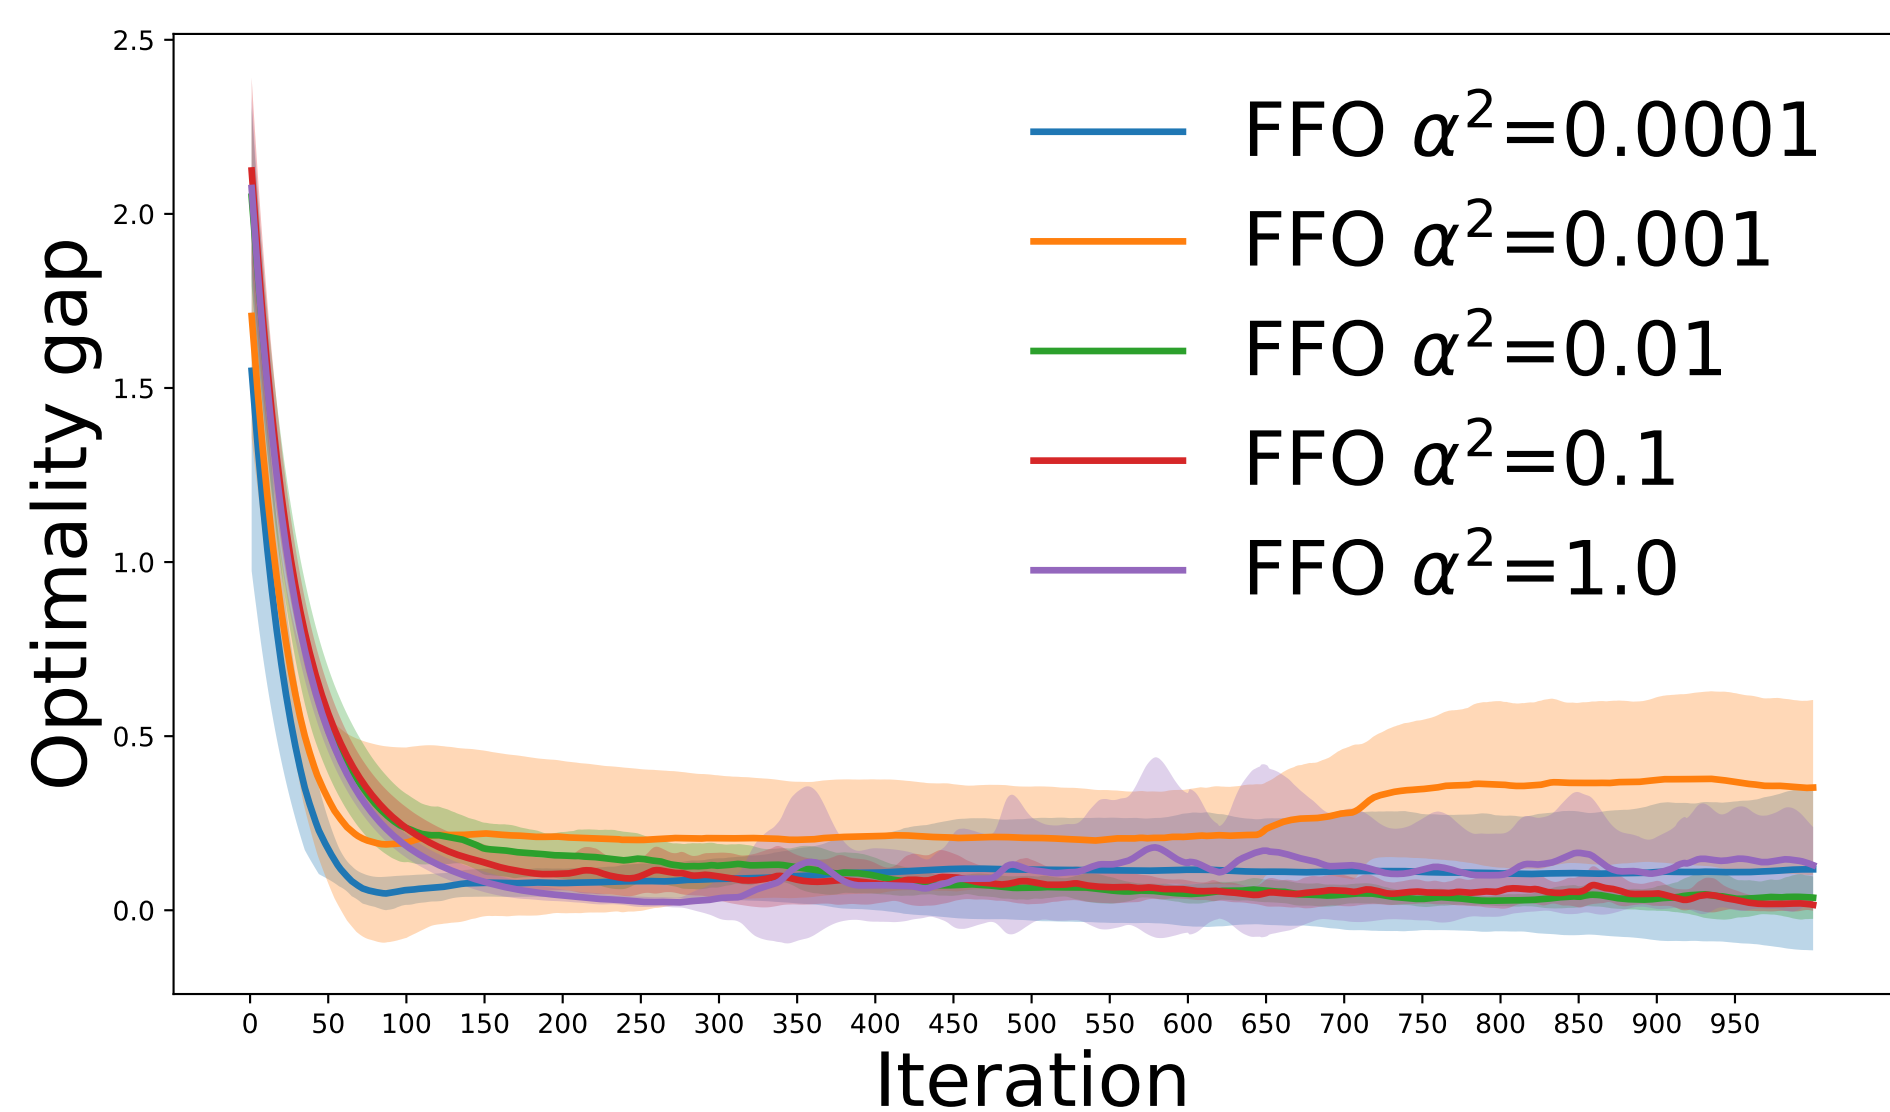

Supplement: supplementary_material [file attachment]

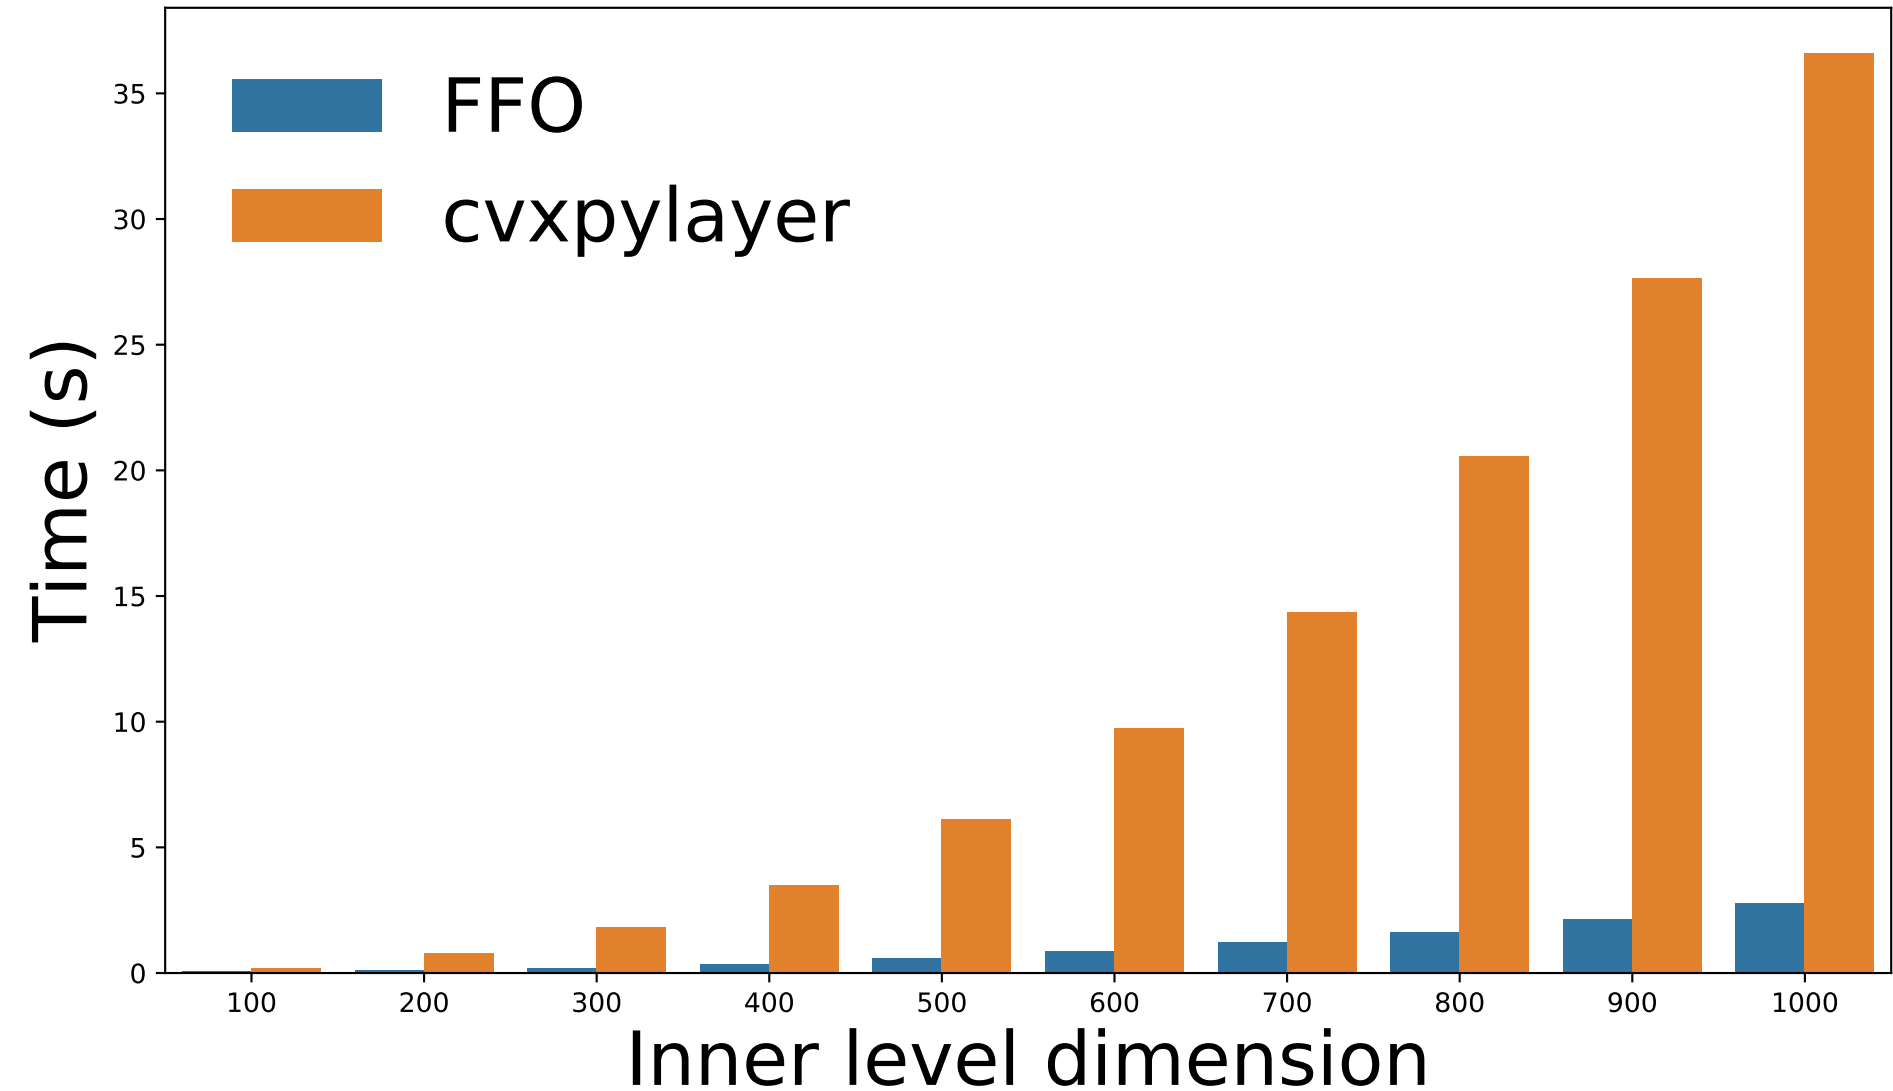

Supplement: supplementary_material [file attachment]

Optimality gap

2.5  
2.0  
1.5  
1.0  
0.5  
0.0

0 50 100 150 200 250 300 350 400 450 500 550 600 650 700 750 800 850 900 950

Iteration

- FFO  $\alpha^2=0.0001$
- FFO  $\alpha^2=0.001$
- FFO  $\alpha^2=0.01$
- FFO  $\alpha^2=0.1$
- FFO  $\alpha^2=1.0$

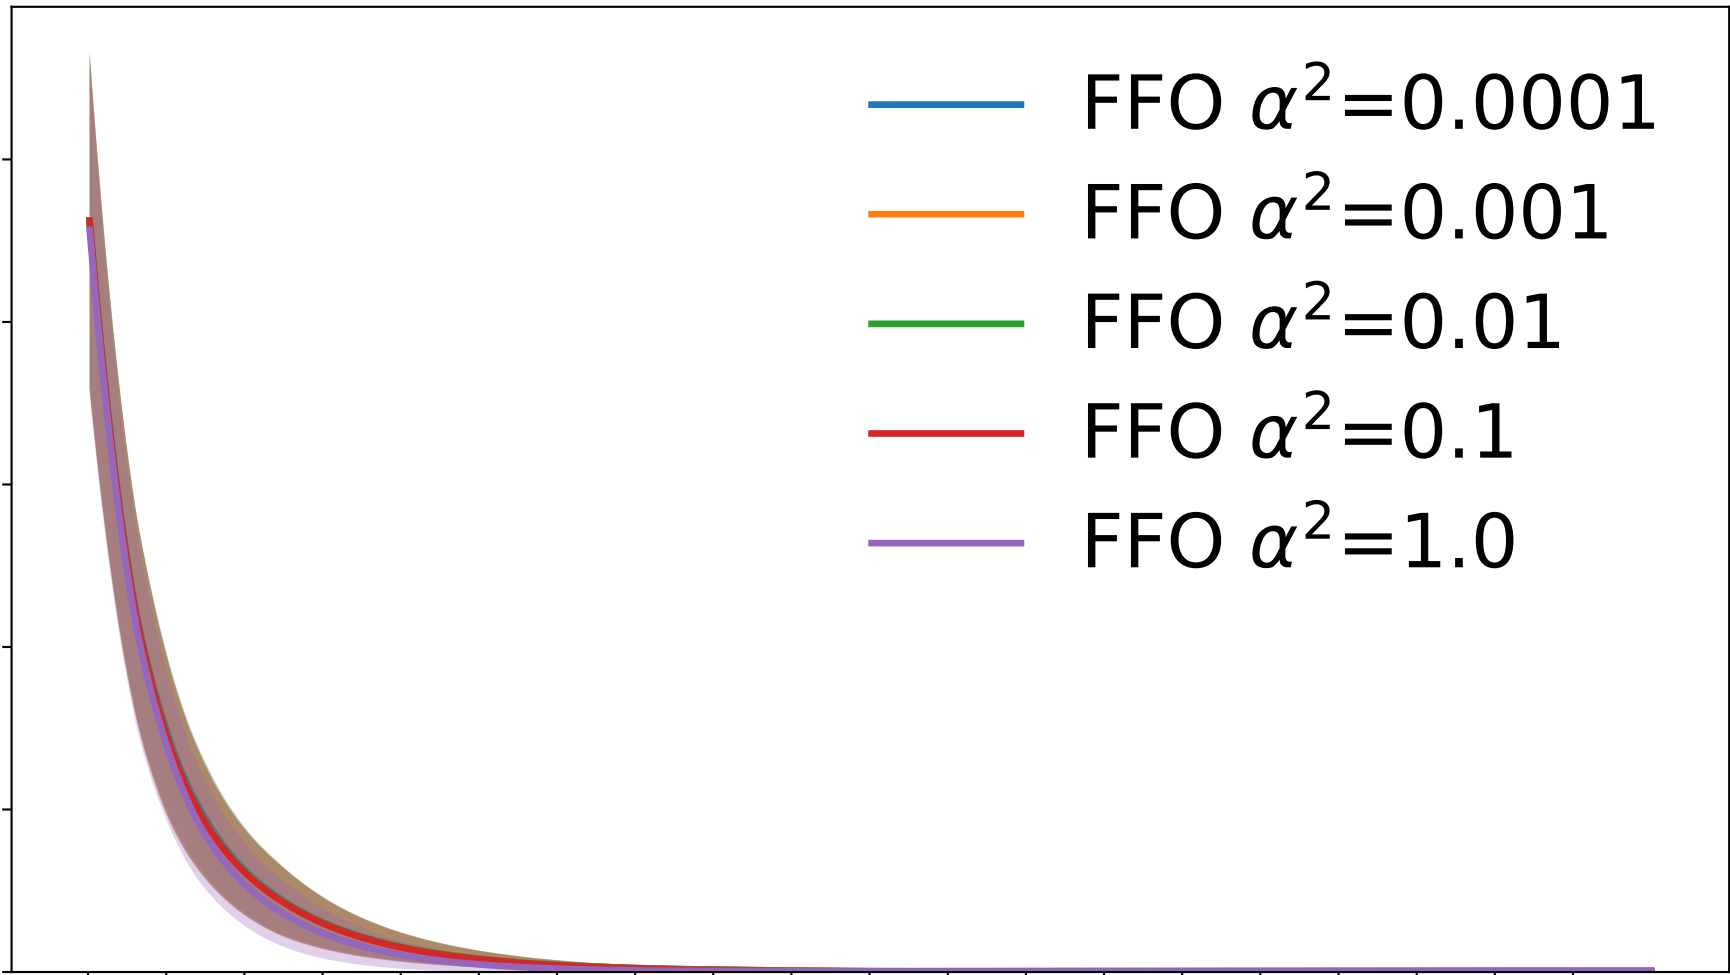

Supplement: supplementary_material [file attachment]

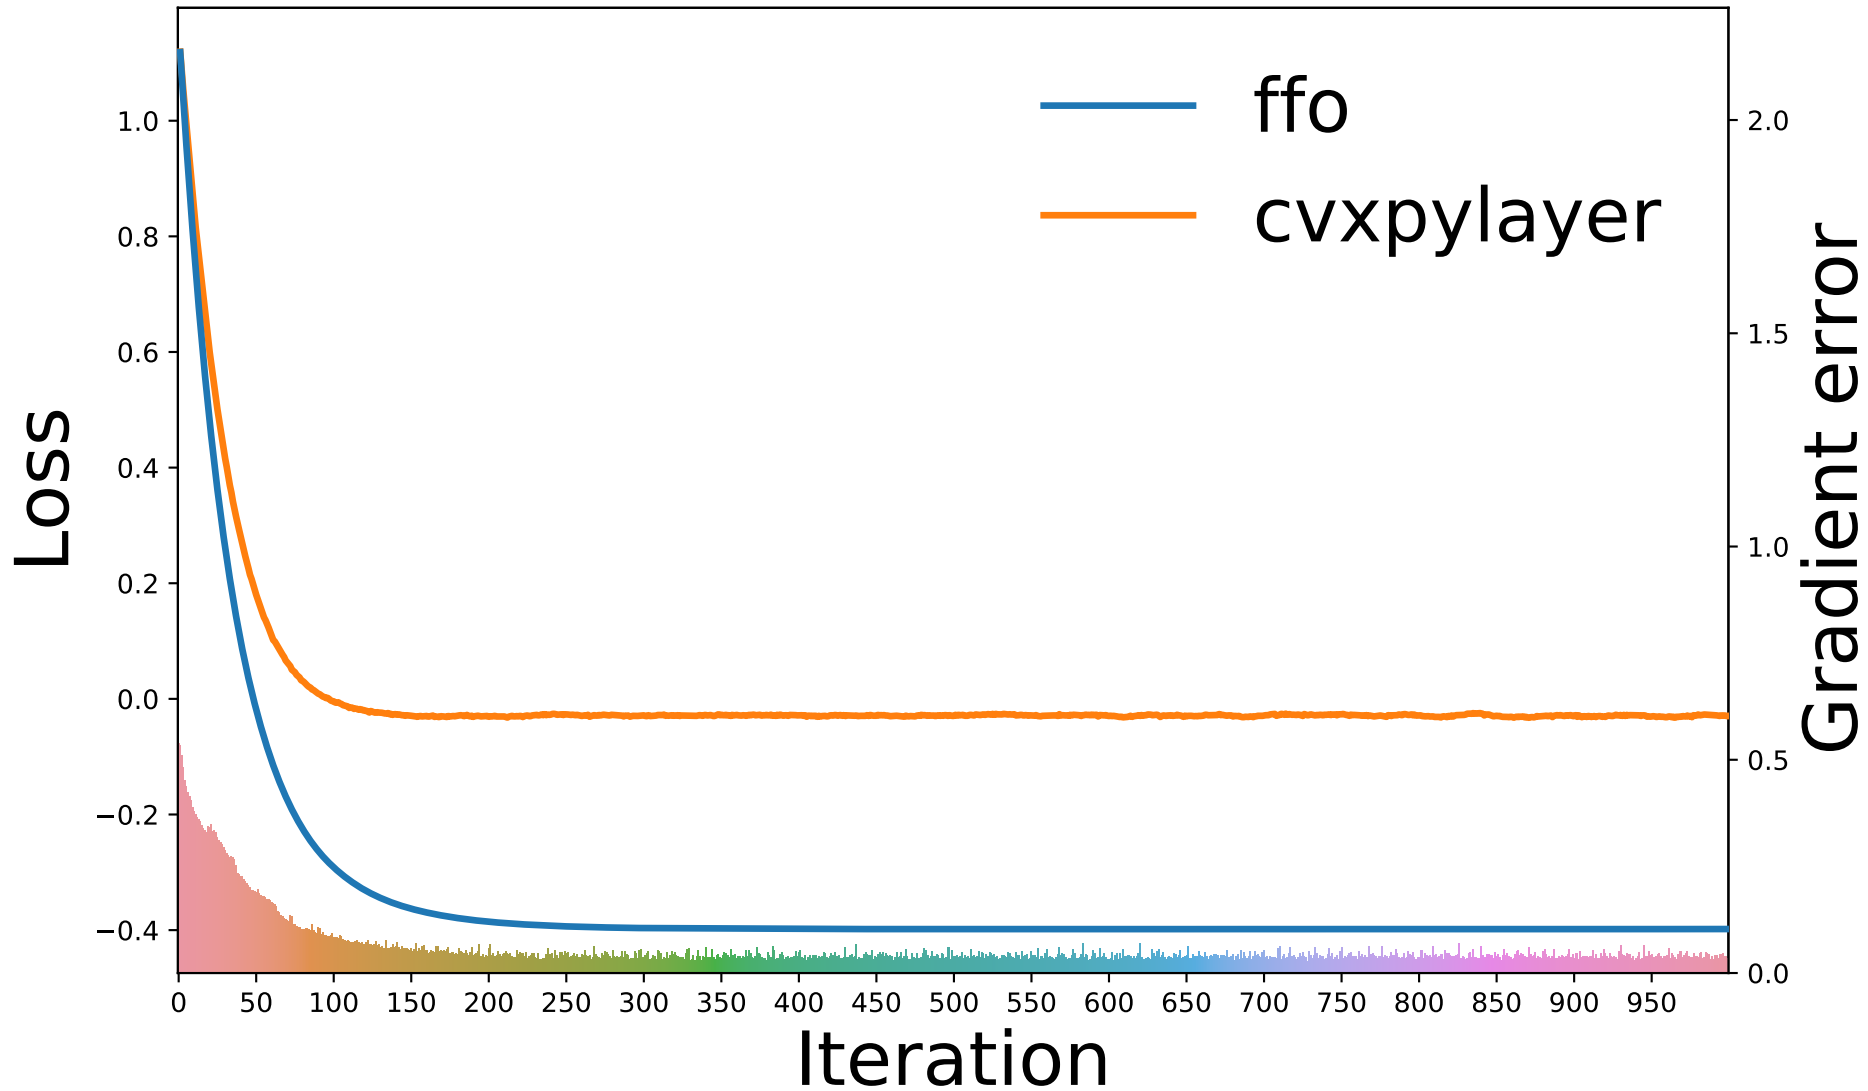

Supplement: supplementary_material [file attachment]

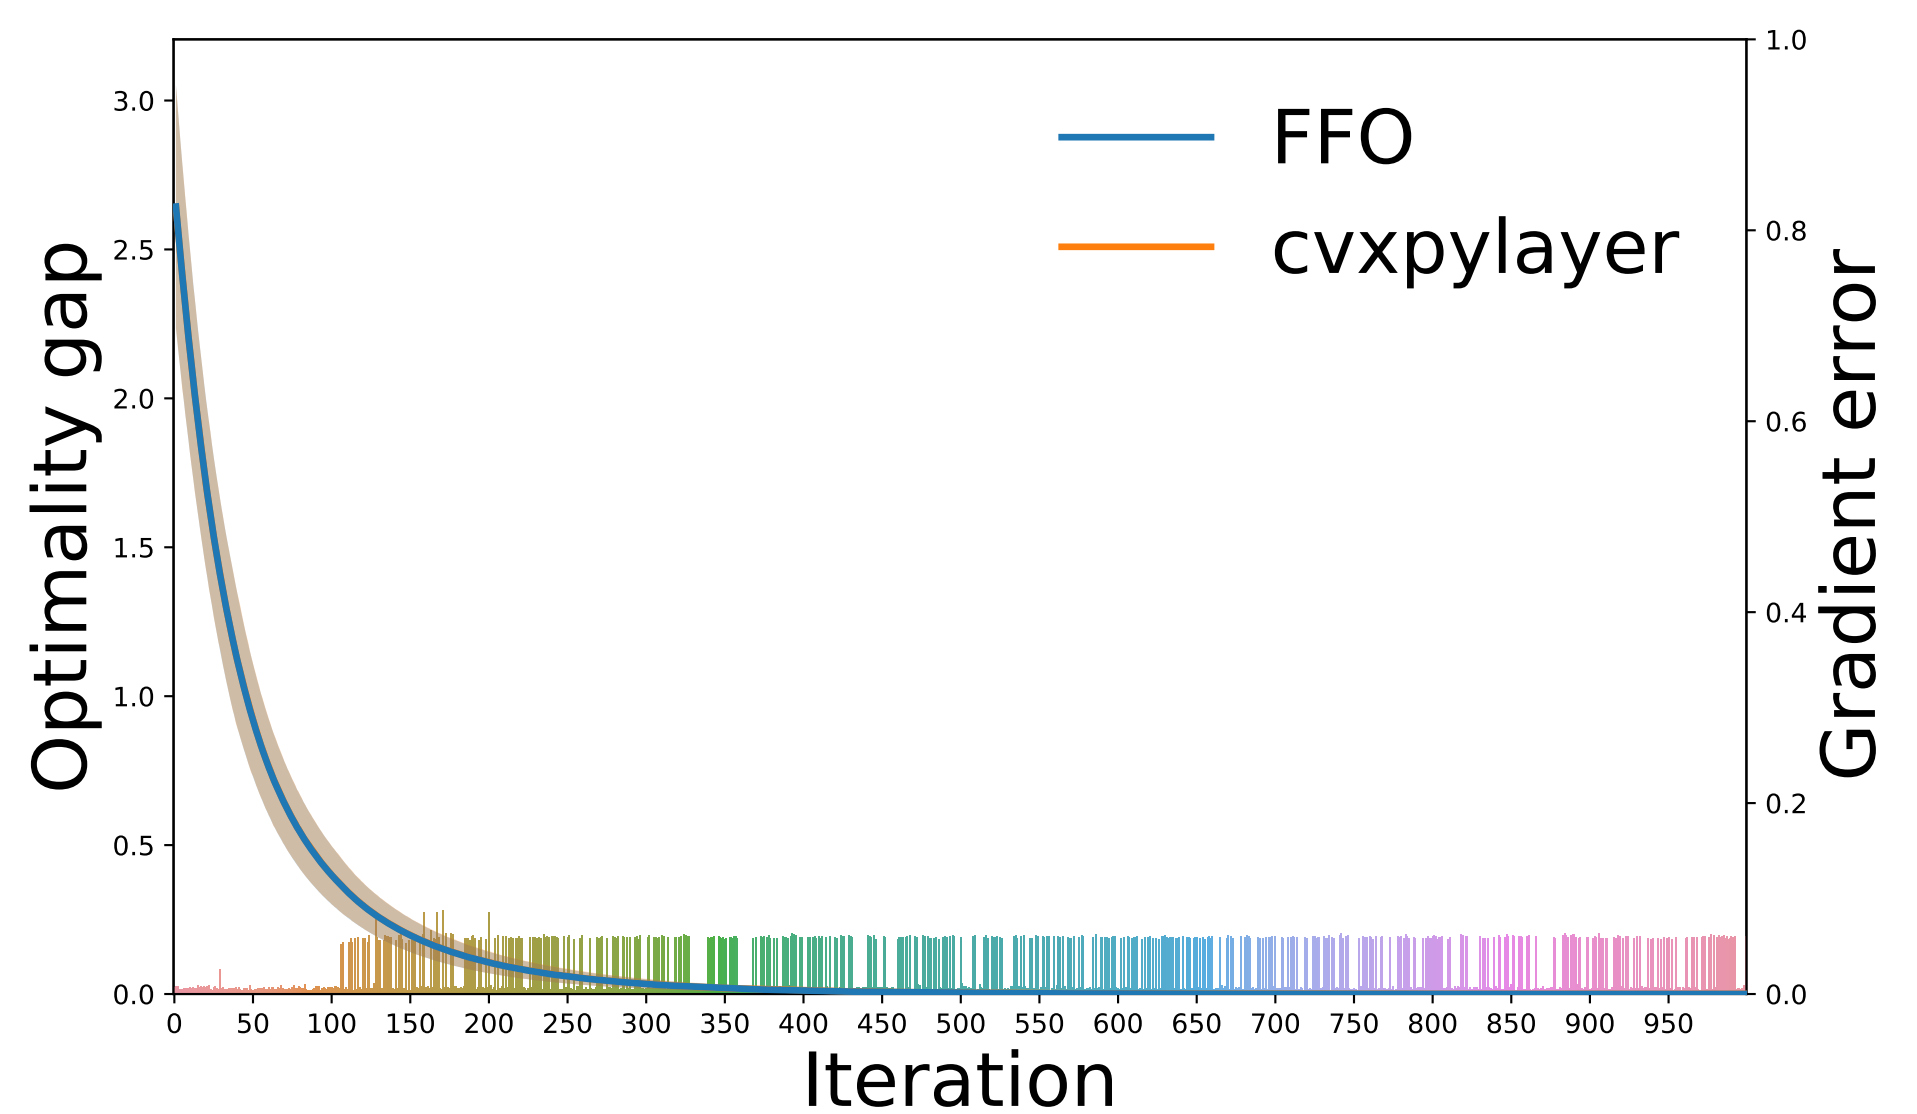

Supplement: supplementary_material [file attachment]

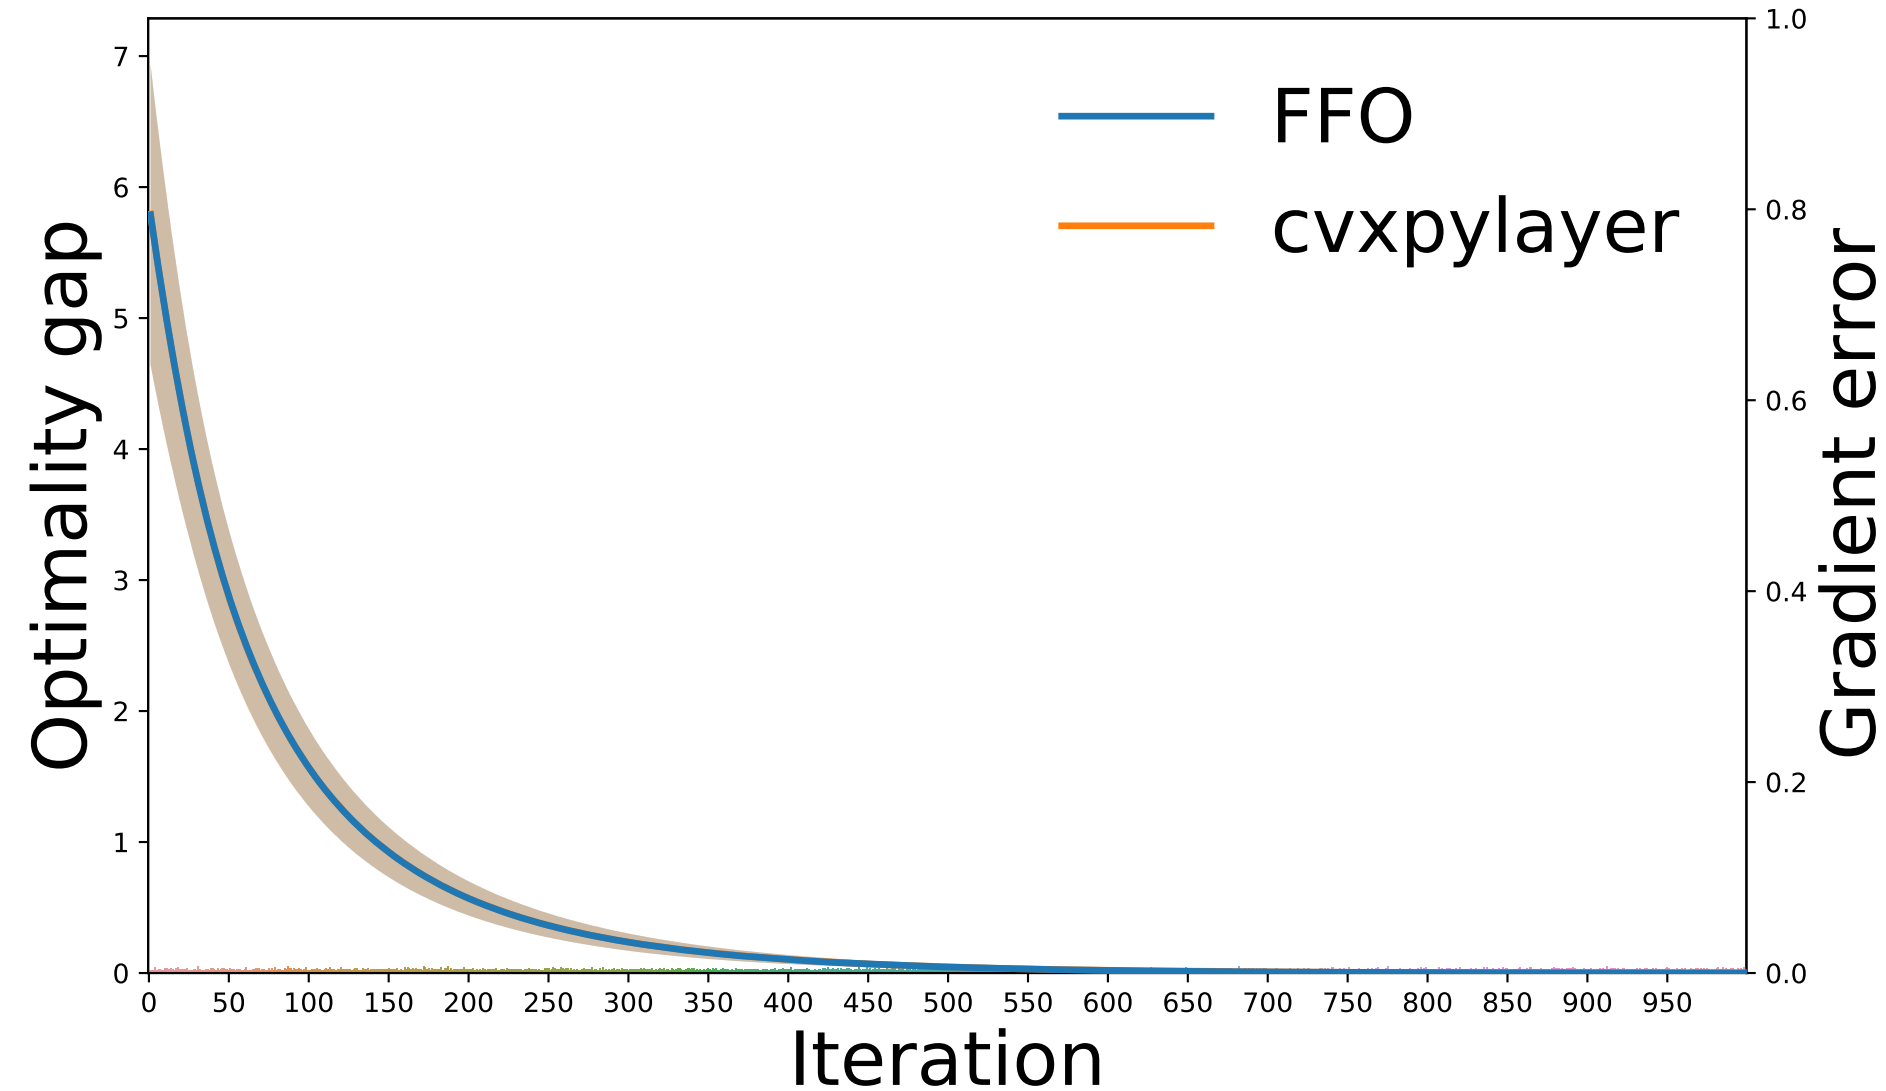

Supplement: supplementary_material [file attachment]

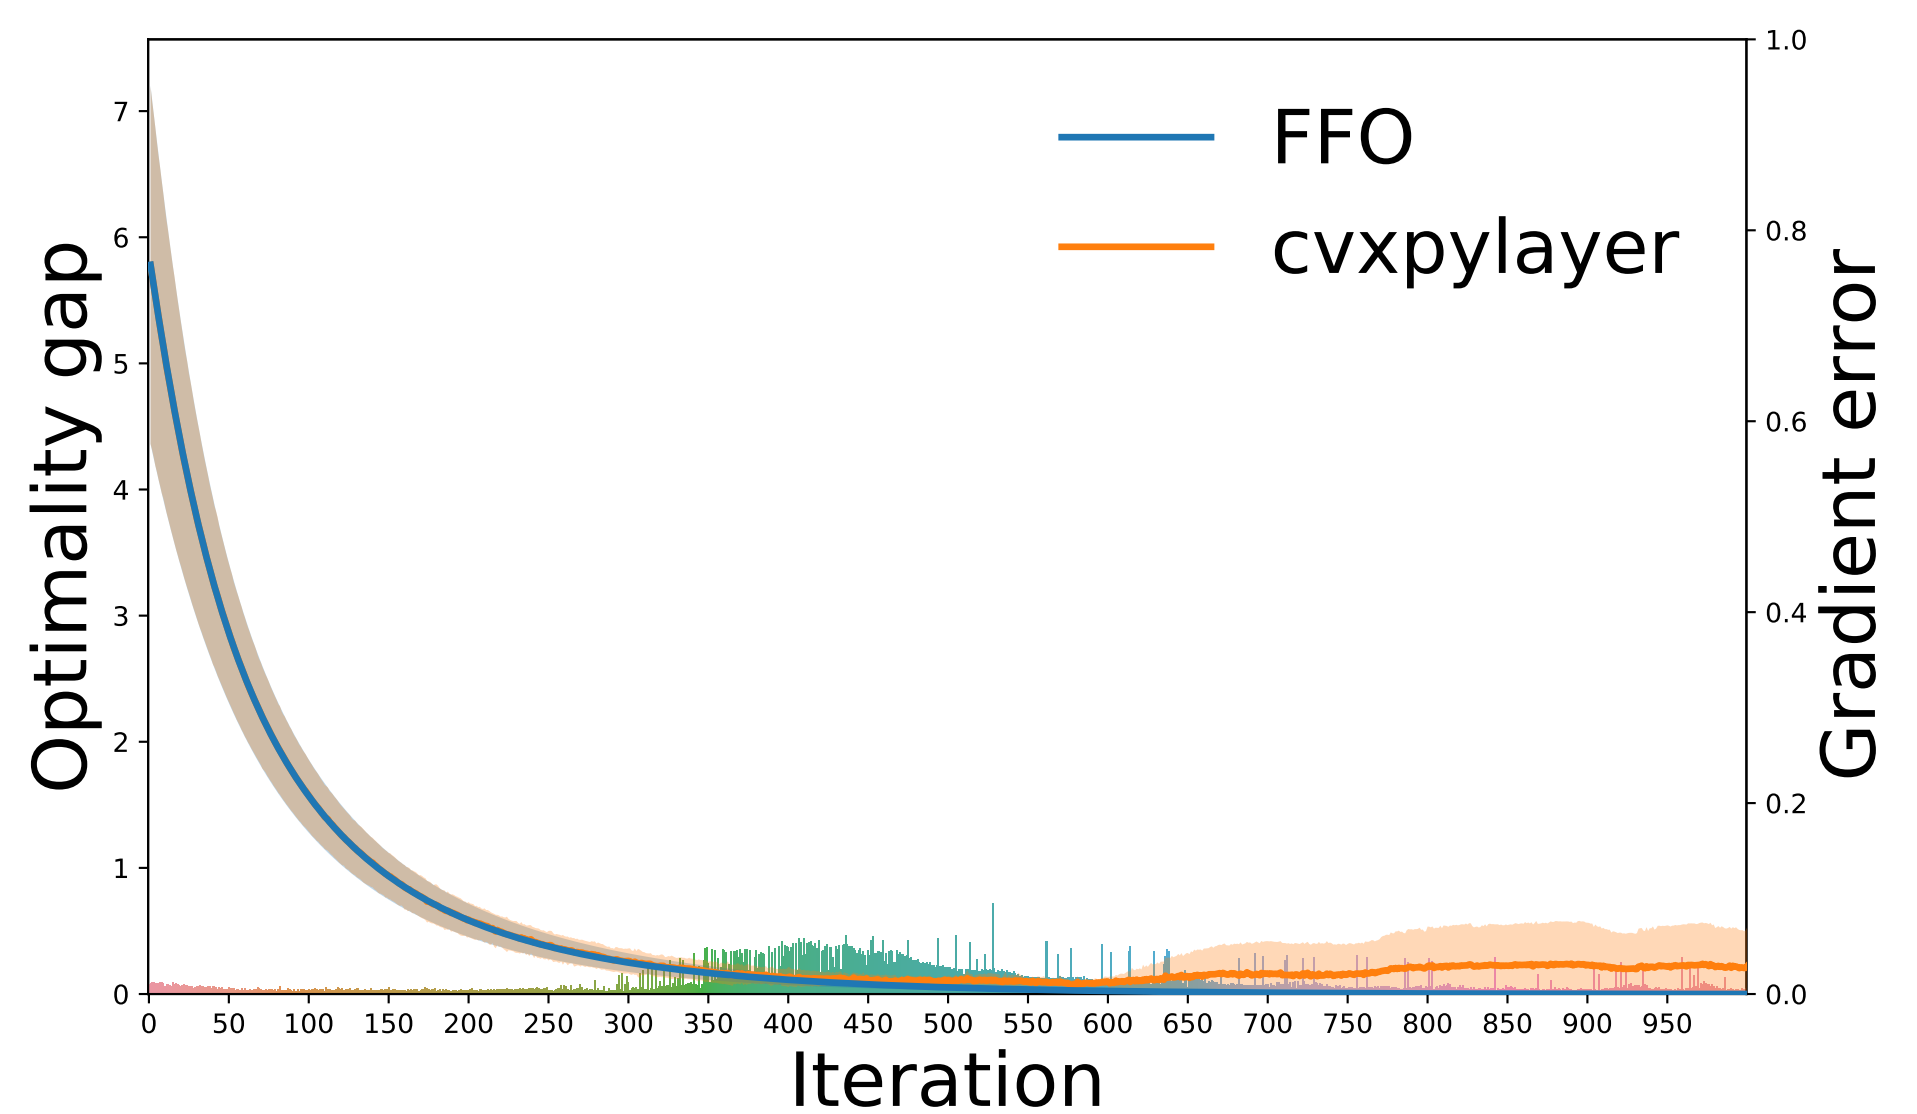

Supplement: supplementary_material [file attachment]

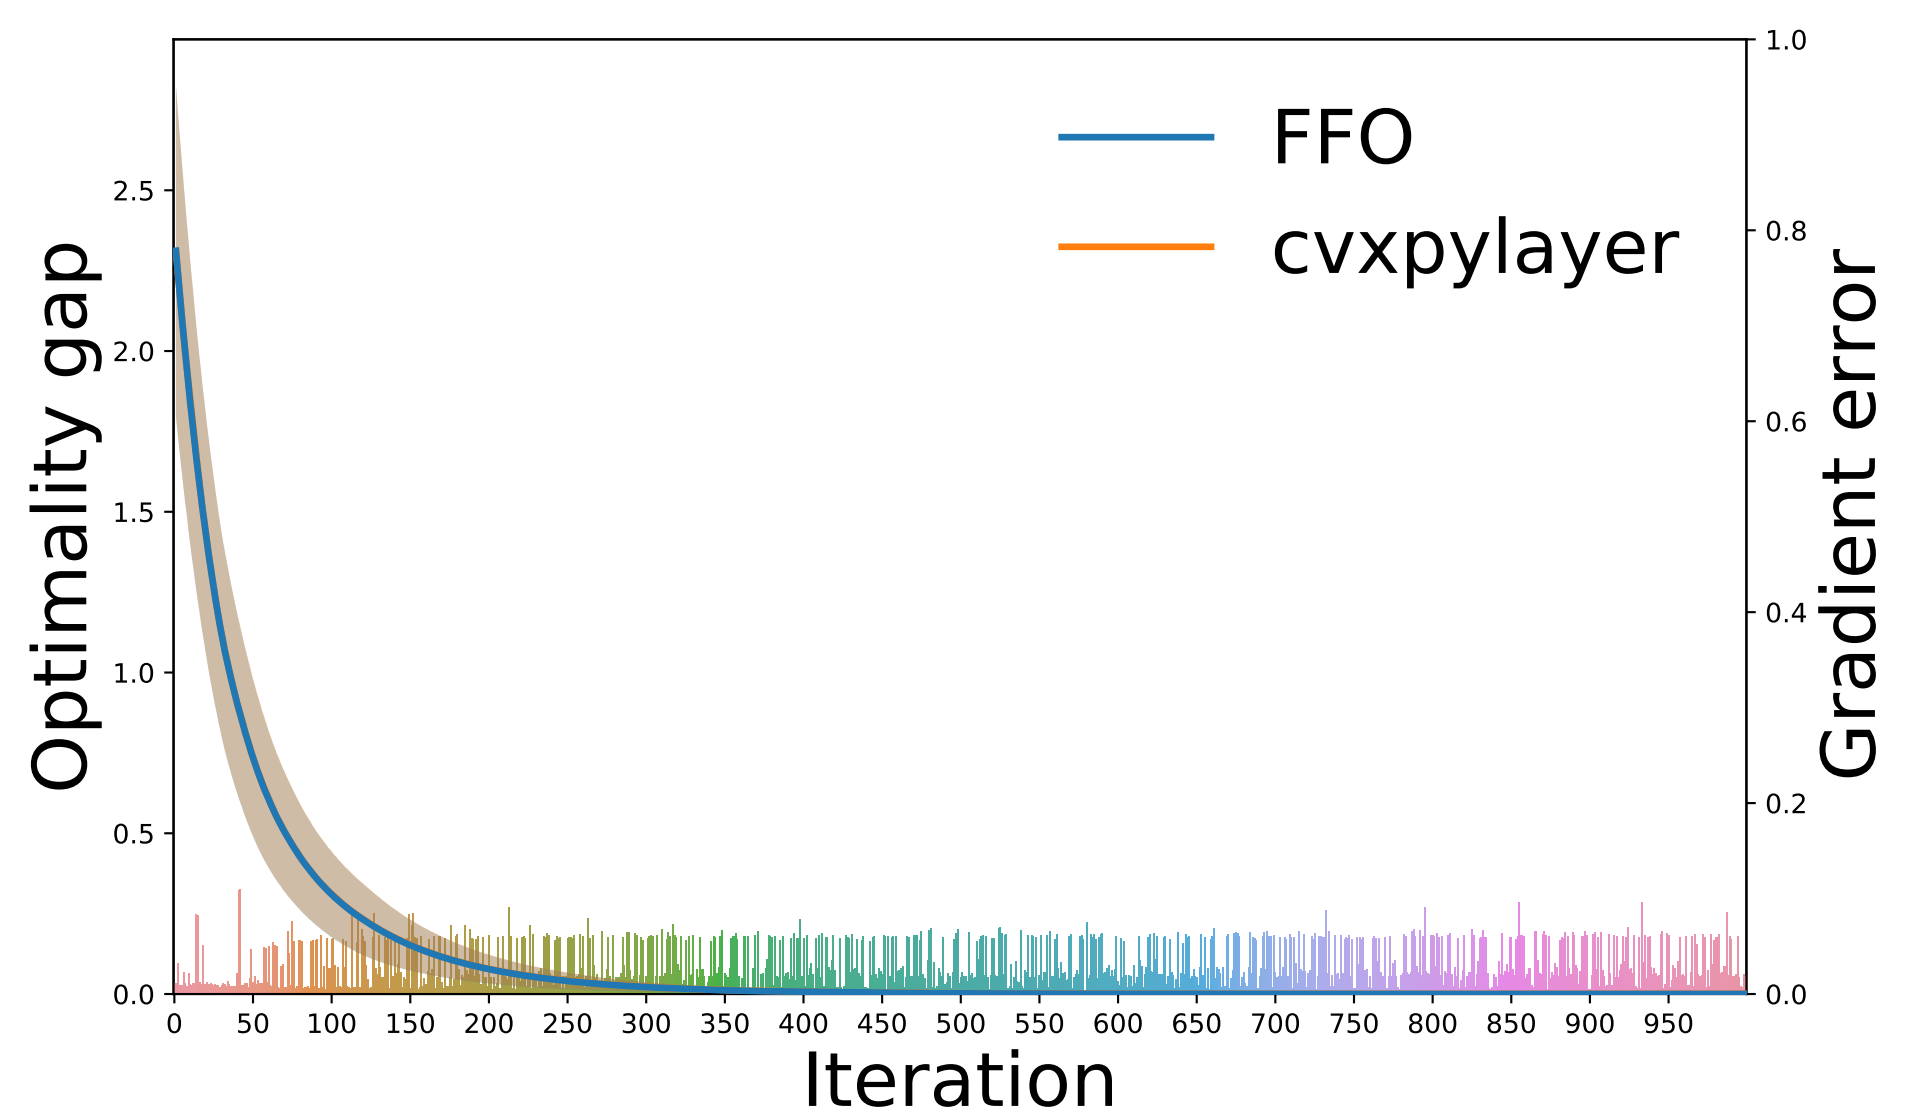

Supplement: supplementary_material [file attachment]

Optimality gap

2.0  
1.5  
1.0  
0.5  
0.0

0 50 100 150 200 250 300 350 400 450 500 550 600 650 700 750 800 850 900 950

Iteration

- FFO  $\alpha^2=0.0001$
- FFO  $\alpha^2=0.001$
- FFO  $\alpha^2=0.01$
- FFO  $\alpha^2=0.1$
- FFO  $\alpha^2=1.0$

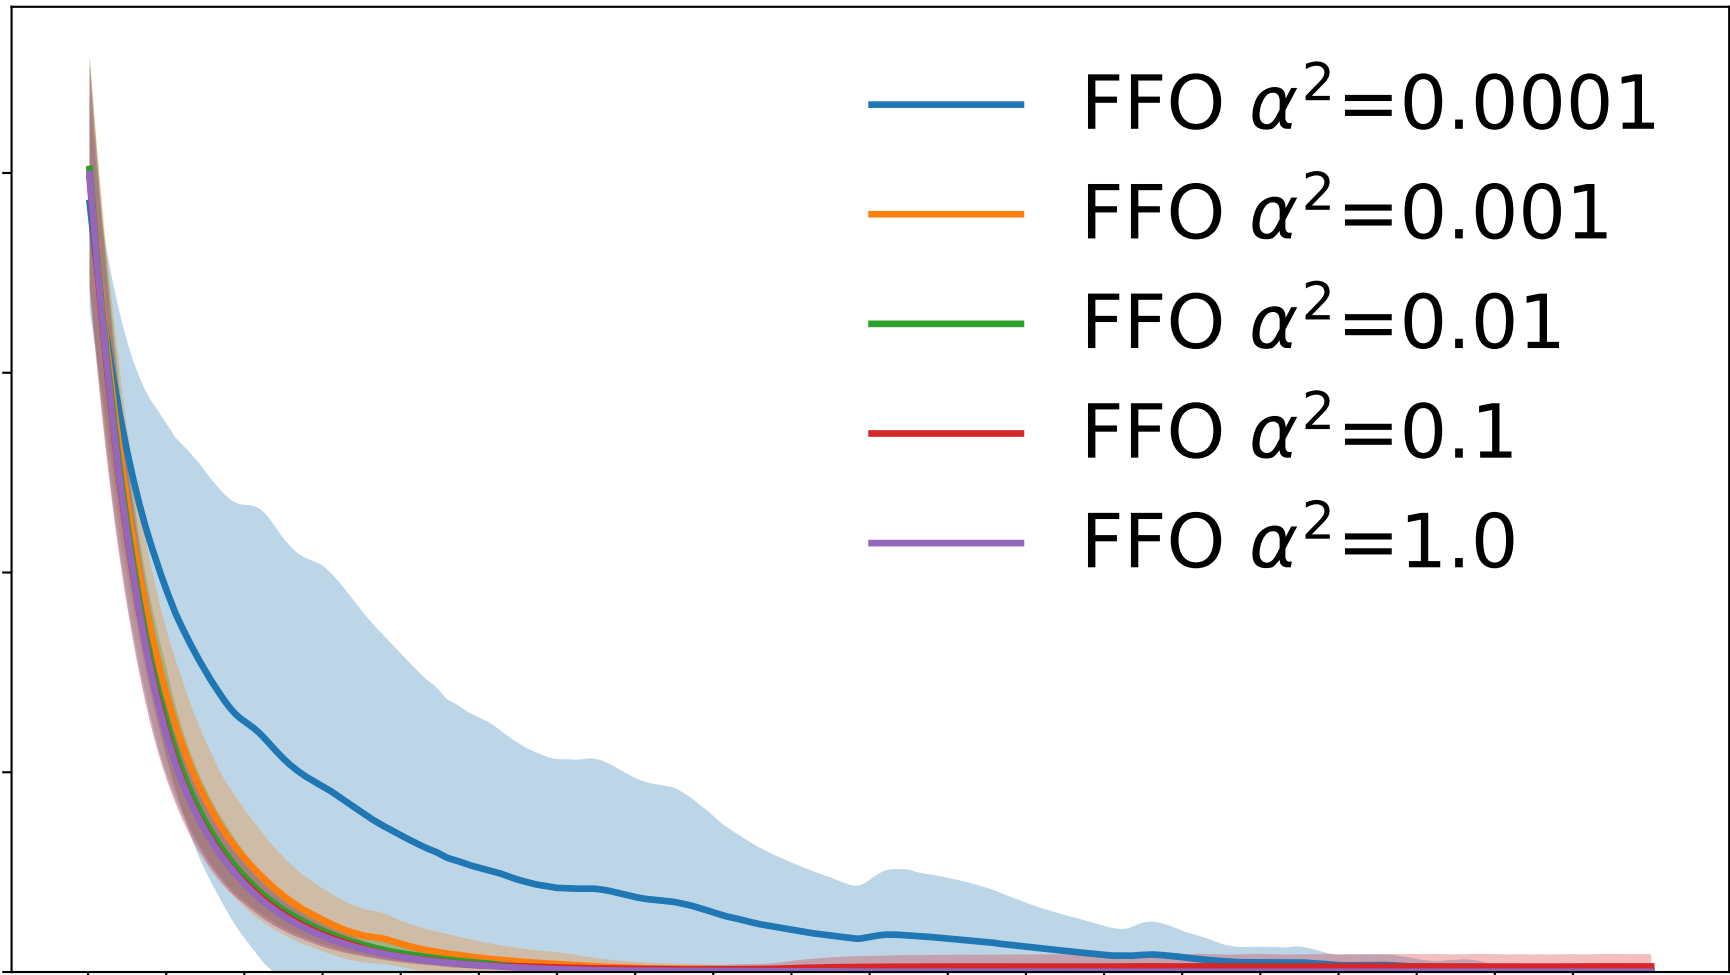

Supplement: supplementary_material [file attachment]

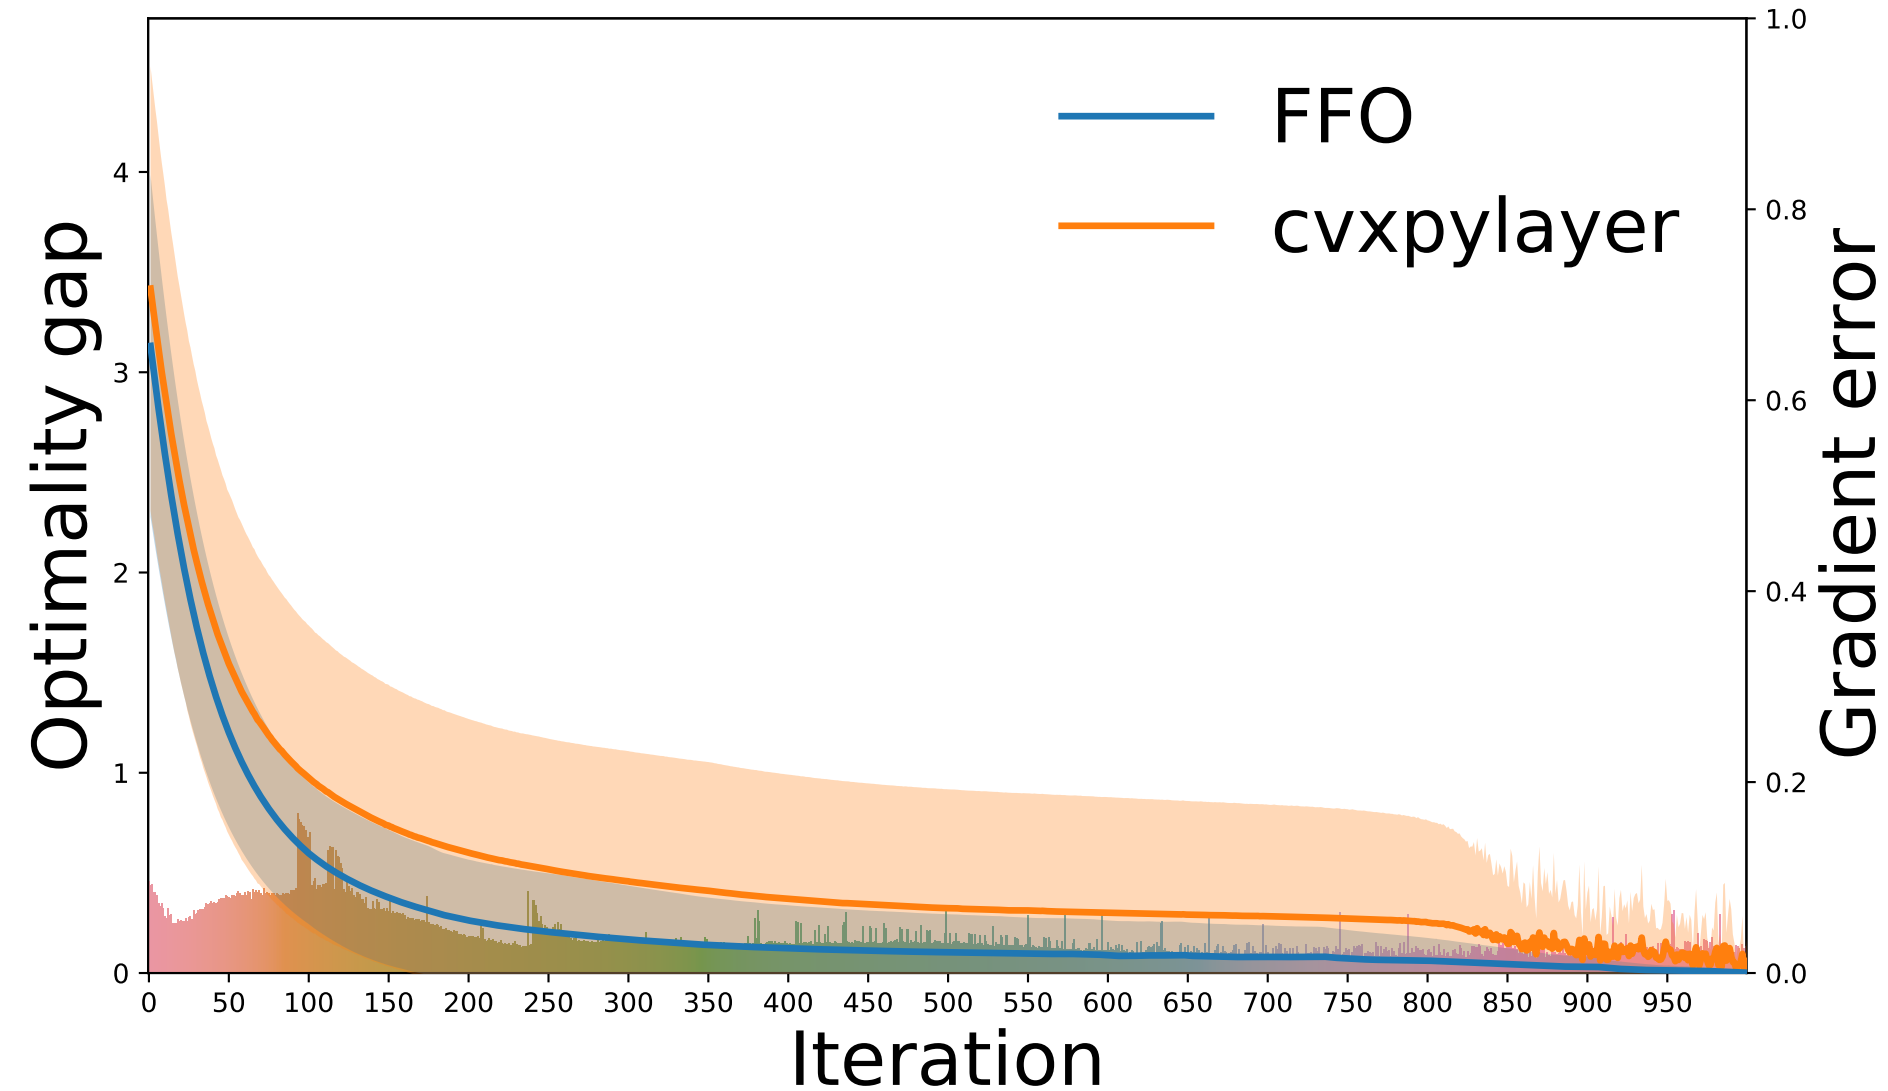

Supplement: supplementary_material [file attachment]

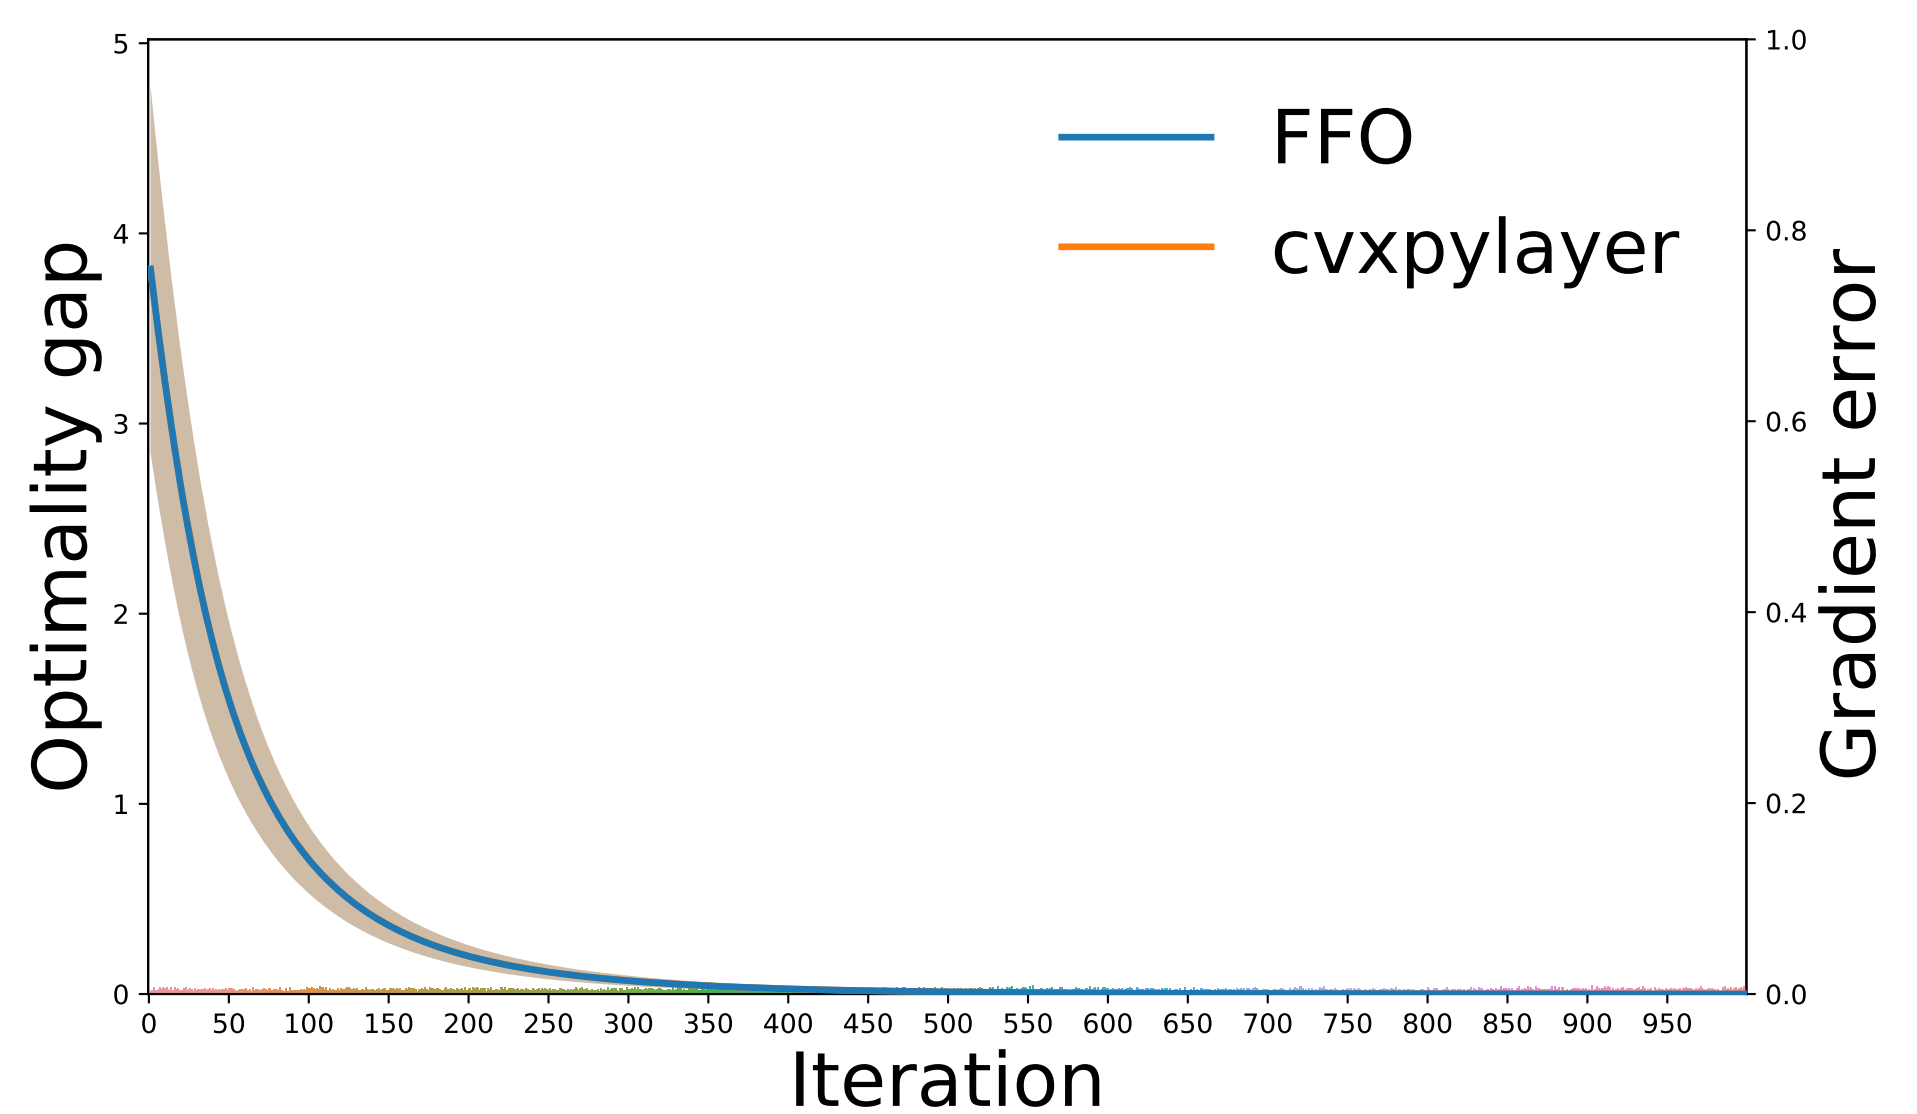

Supplement: supplementary_material [file attachment]

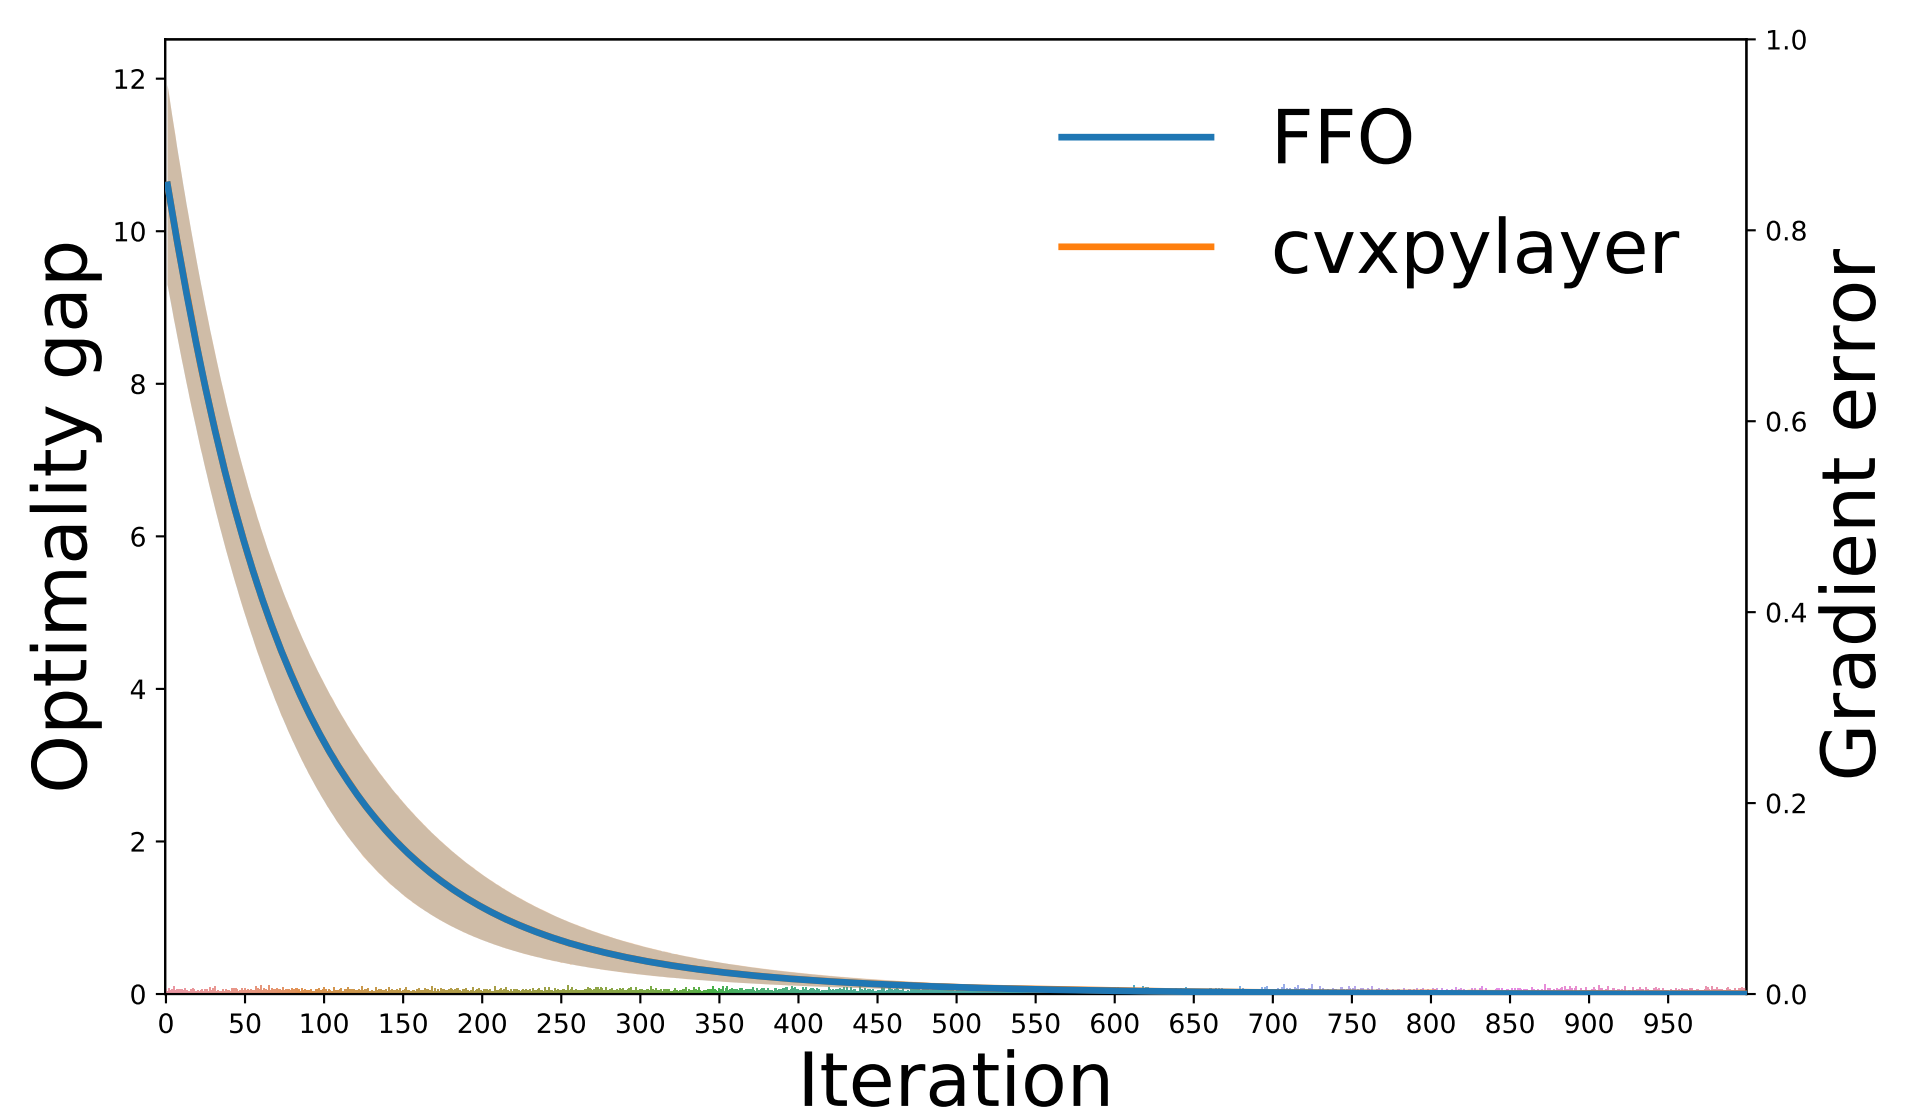

Supplement: supplementary_material [file attachment]

Optimality gap

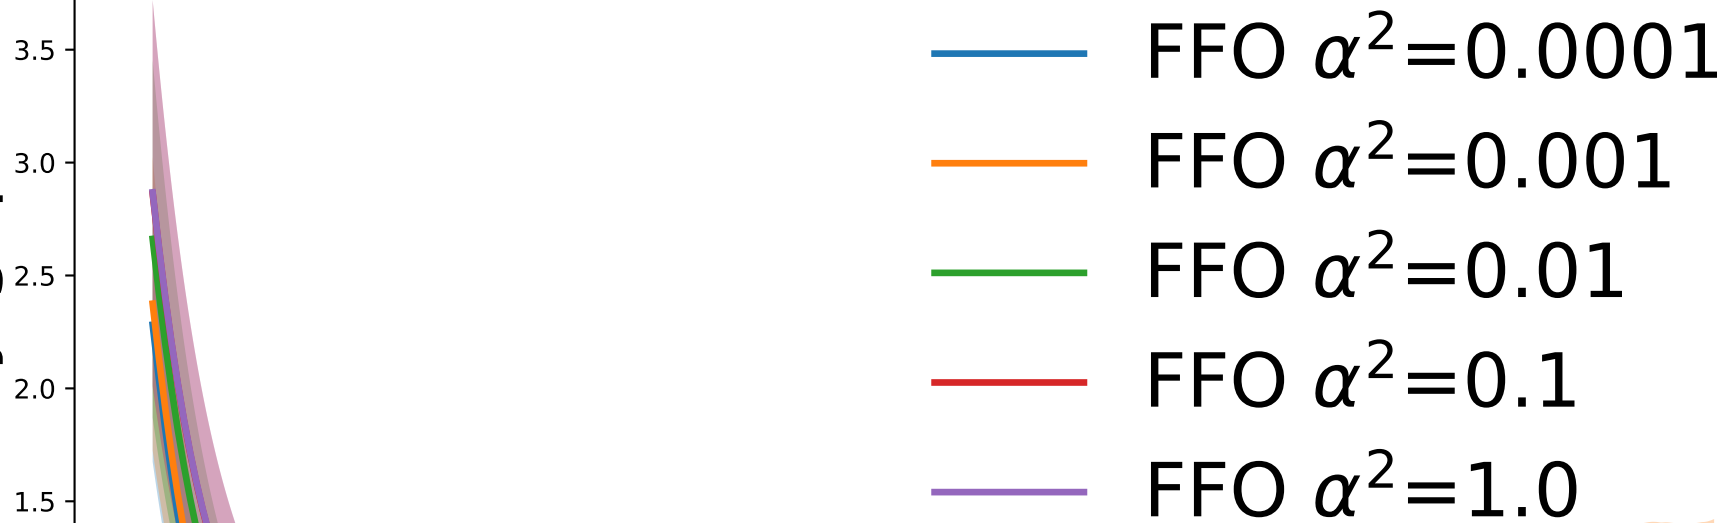

Iteration

Supplement: supplementary_material [file attachment]

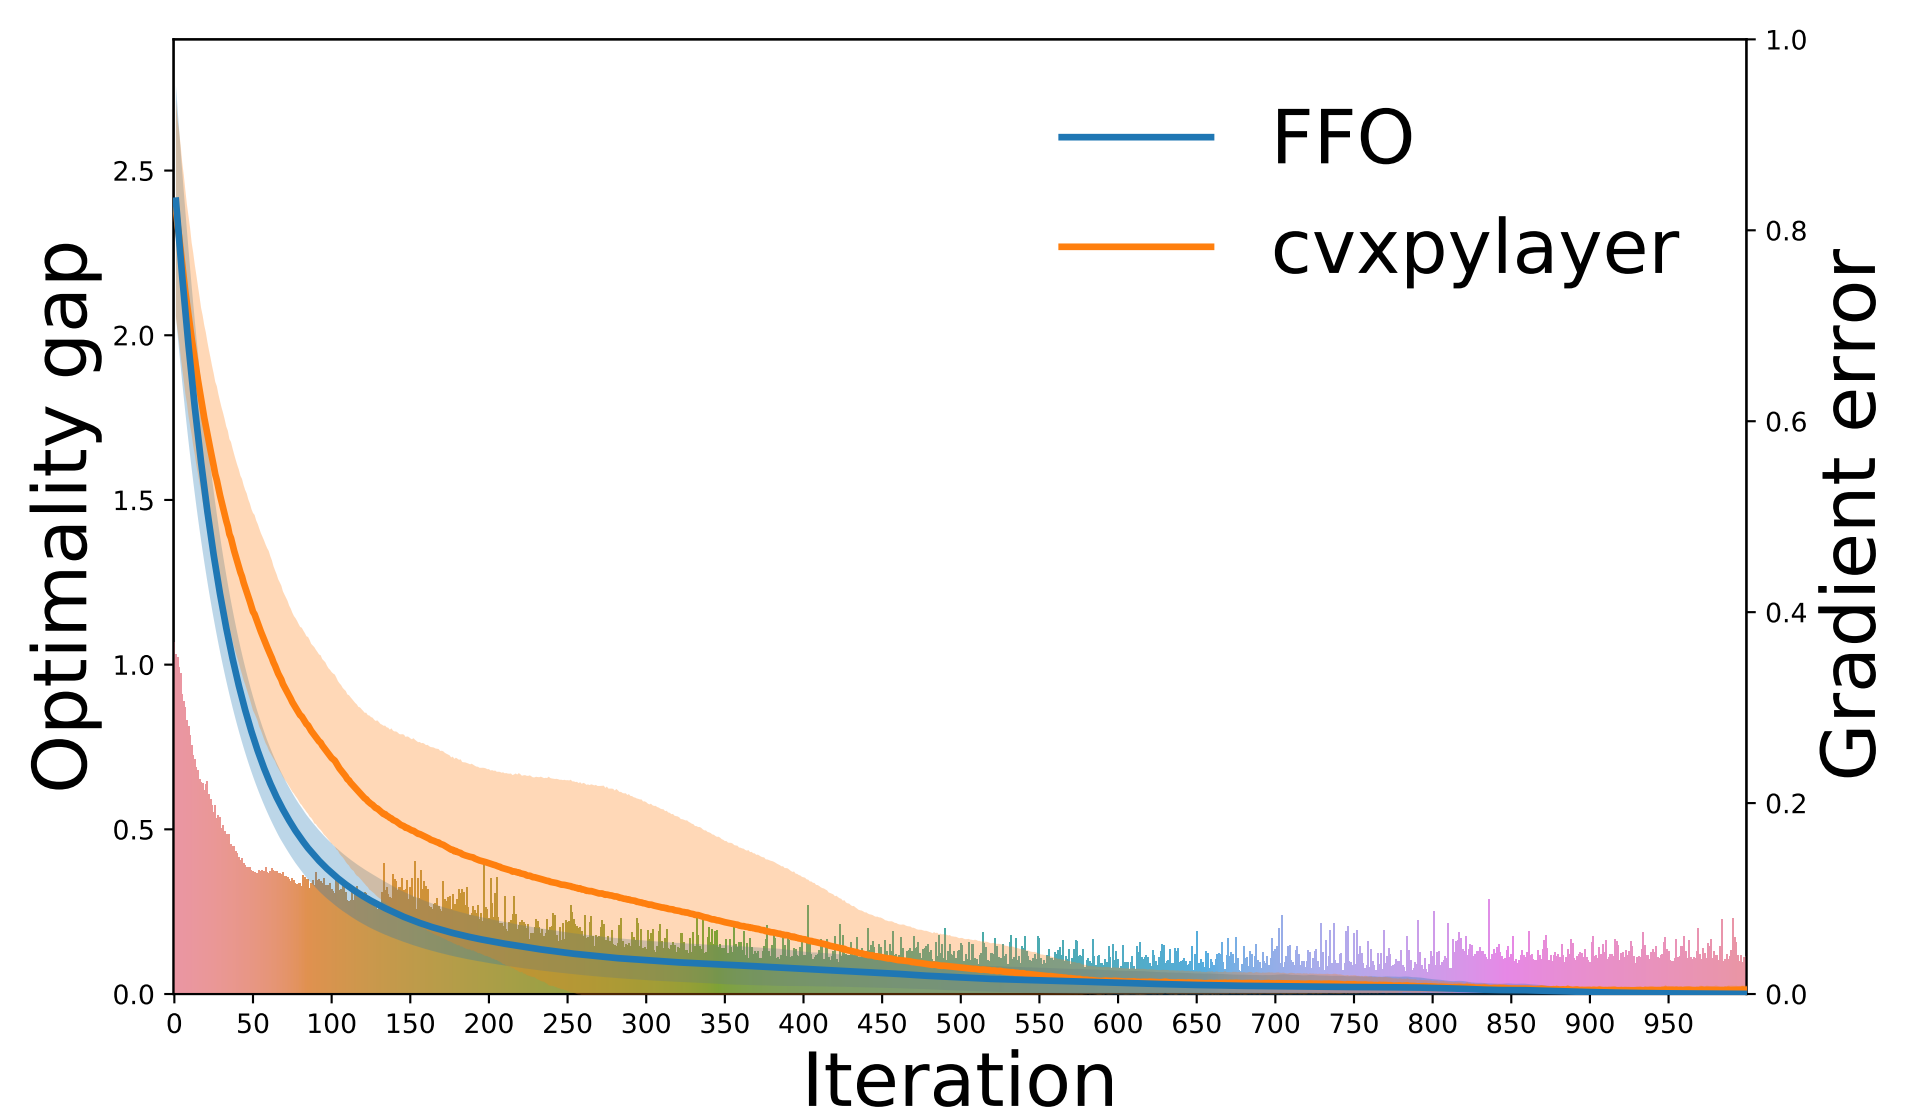

Supplement: supplementary_material [file attachment]

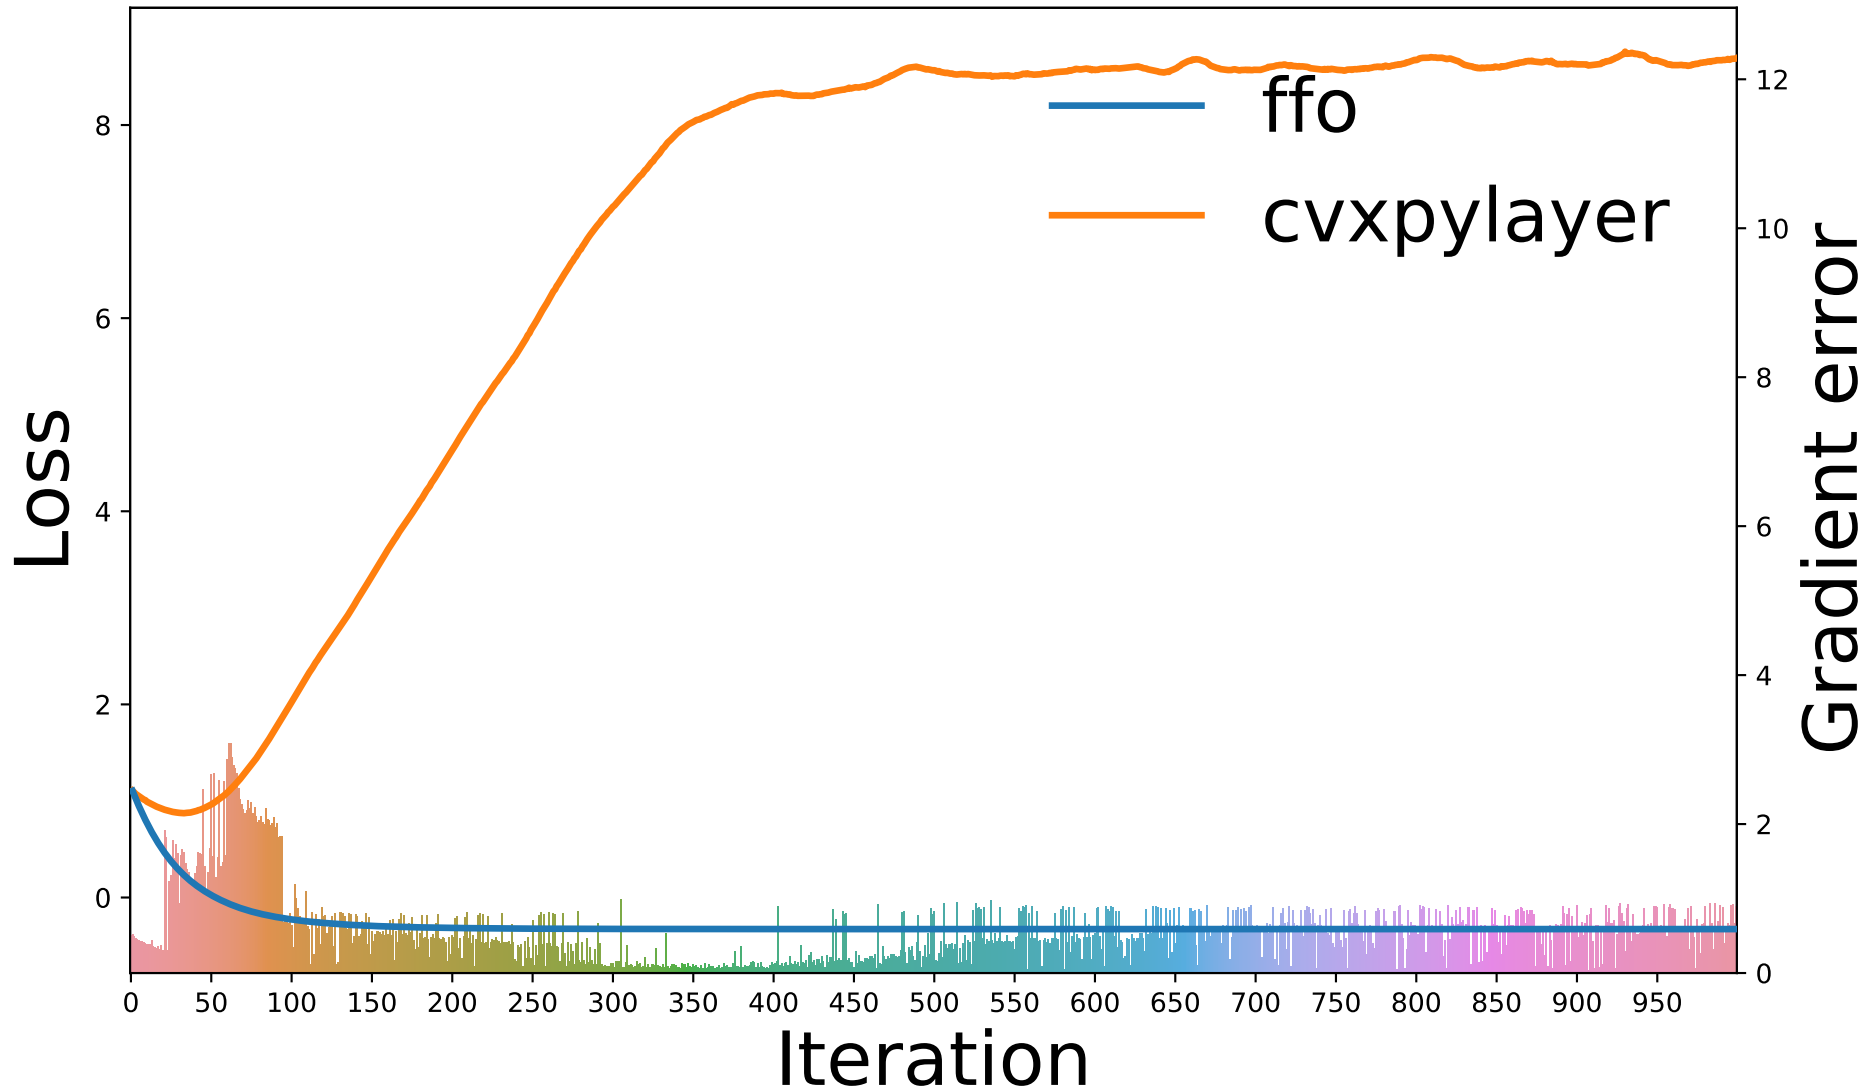

Supplement: supplementary_material [file attachment]

Optimality gap

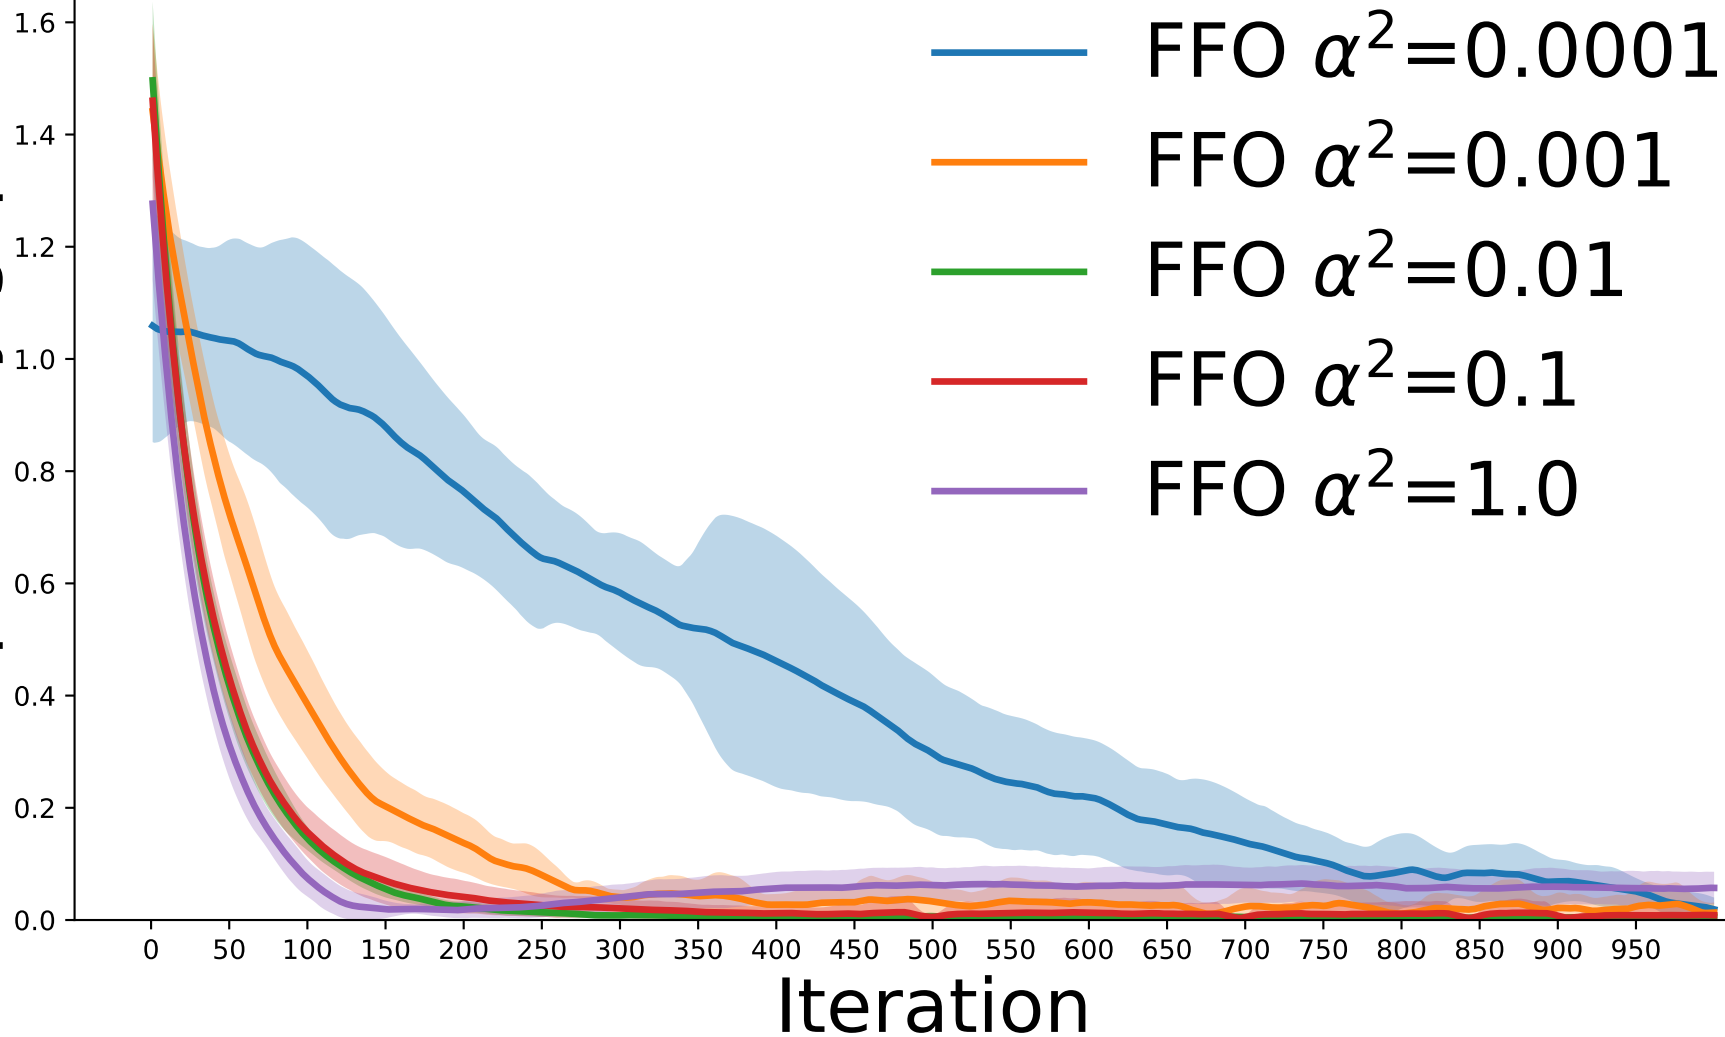

Supplement: supplementary_material [file attachment]

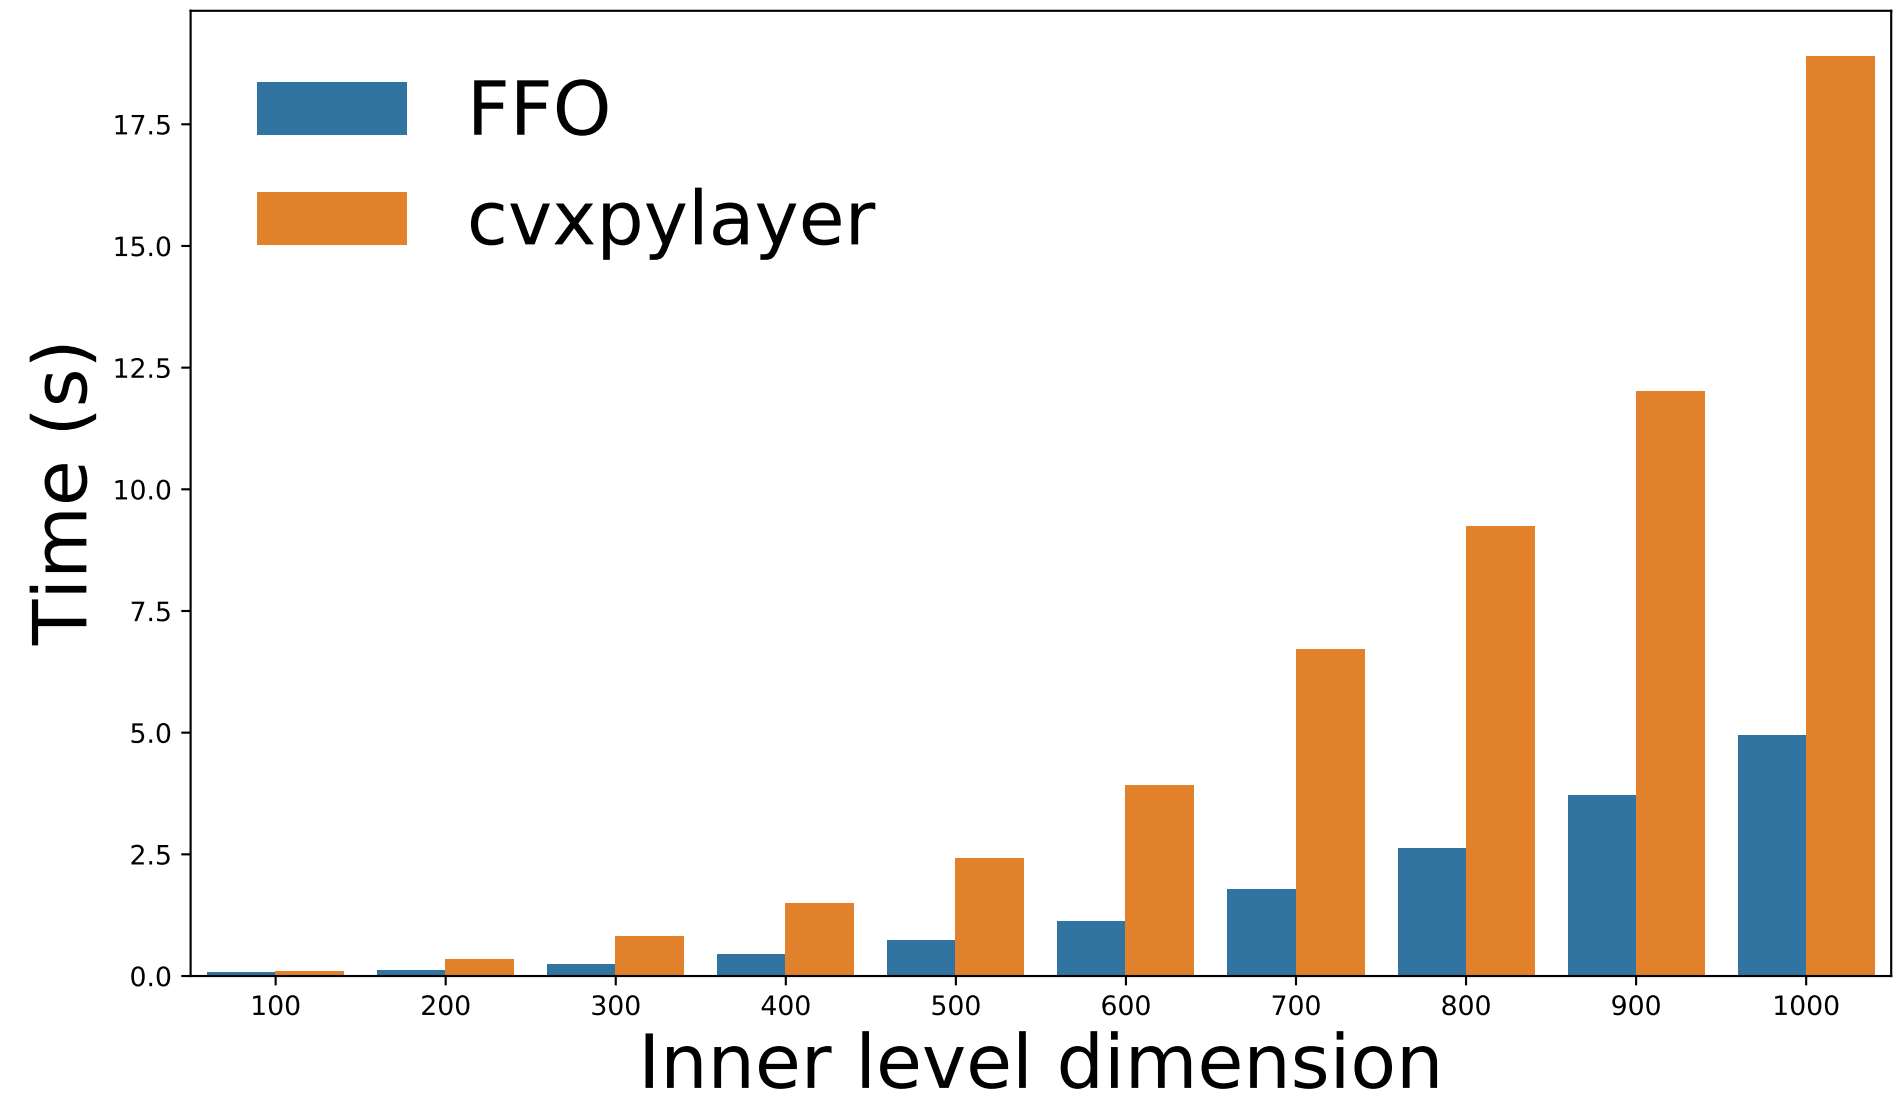

Supplement: supplementary_material [file attachment]

Optimality gap

2.5  
2.0  
1.5  
1.0  
0.5  
0.0

- FFO  $\alpha^2=0.0001$
- FFO  $\alpha^2=0.001$
- FFO  $\alpha^2=0.01$
- FFO  $\alpha^2=0.1$
- FFO  $\alpha^2=1.0$

0 50 100 150 200 250 300 350 400 450 500 550 600 650 700 750 800 850 900 950

Iteration

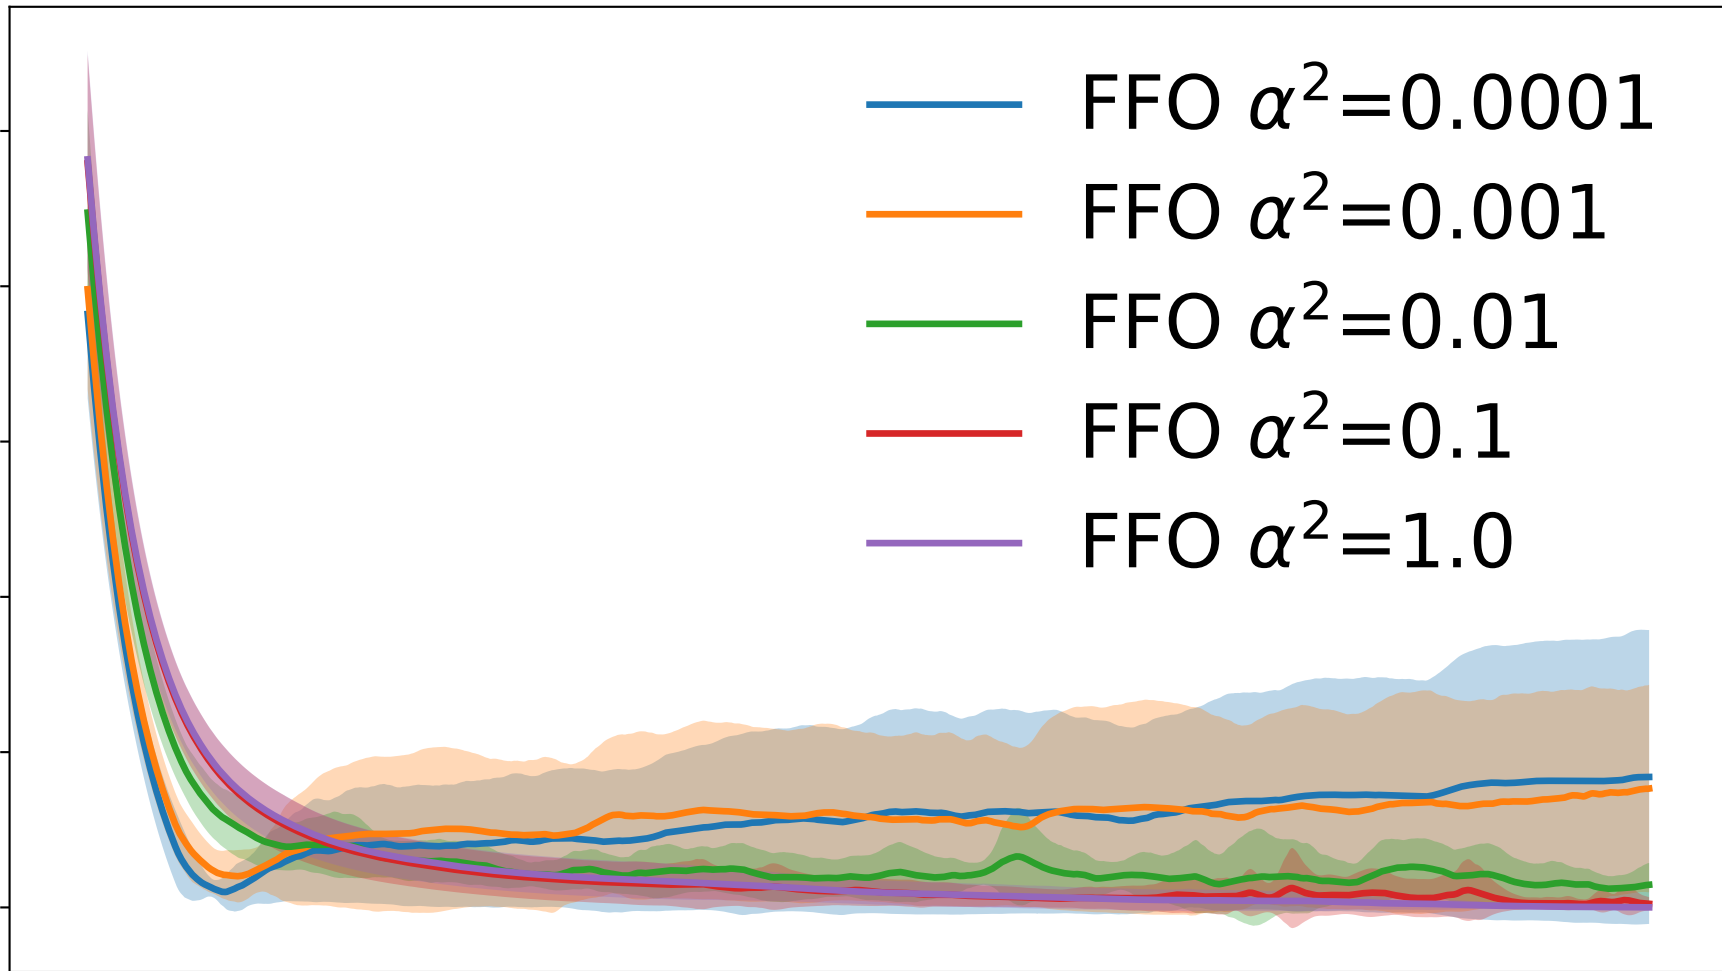

Supplement: supplementary_material [file attachment]

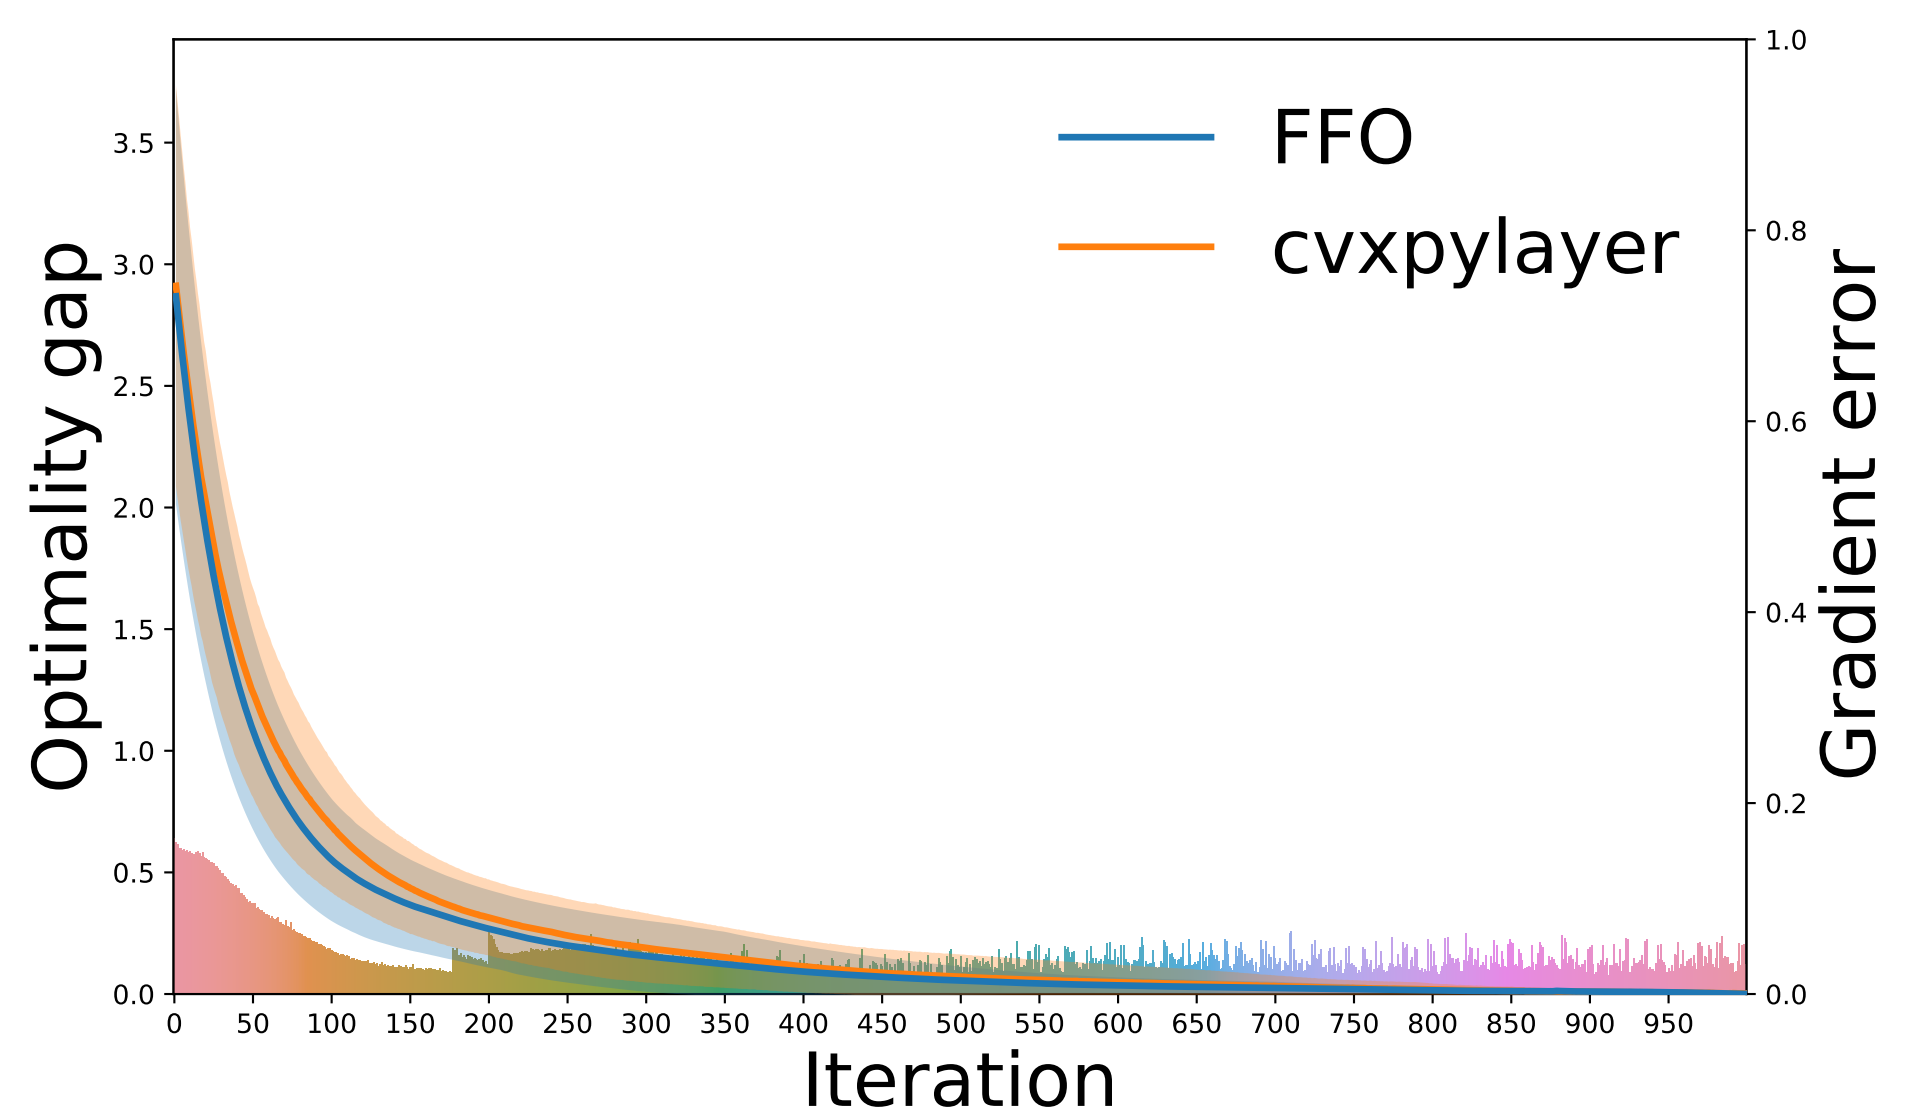

Supplement: supplementary_material [file attachment]

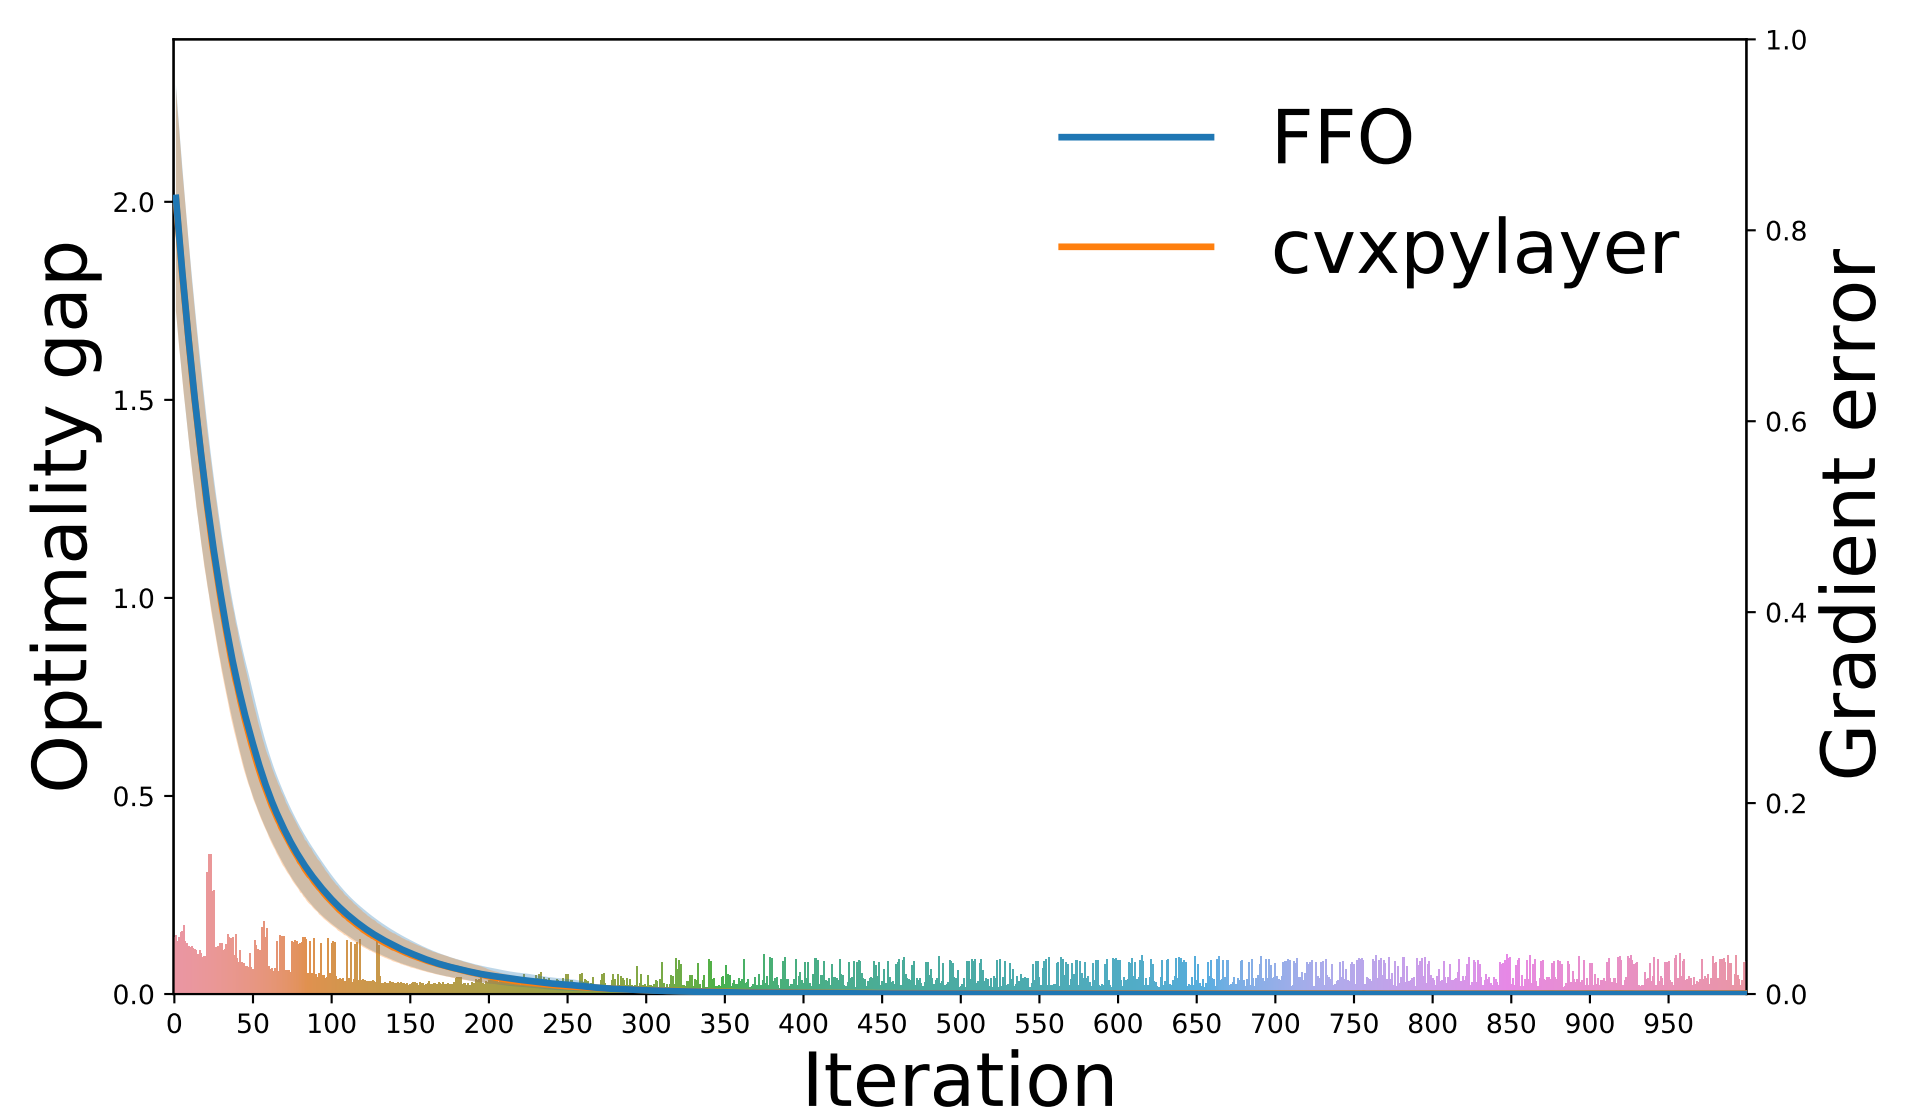

Supplement: supplementary_material [file attachment]
